# Supplementary material for: Citron Kinase Deficiency Leads to Chromosomal Instability and TP53-Sensitive Microcephaly
Source: PubMed Central journal article supplement — Cell Rep. 2017 Feb 14;18(7):1674–86. doi: 10.1016/j.celrep.2017.01.054 (PMC5318669; doi:10.1016/j.celrep.2017.01.054), 2017-02-14
Supplement: mmc7.pdf [file mmc7.pdf]

## Citron Kinase Deficiency Leads to Chromosomal Instability and TP53-Sensitive Microcephaly

### Graphical Abstract

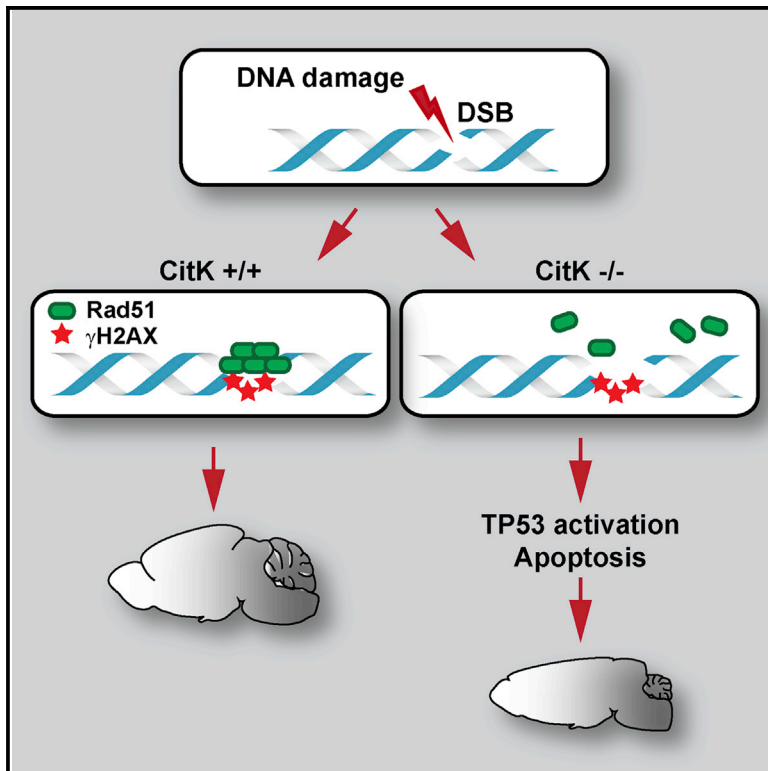

### Authors

Federico Tommaso Bianchi, Chiara Tocco, Gianmarco Pallavicini, ..., Stephan Geley, Maurizio Gatti, Ferdinando Di Cunto

### Correspondence

federico.bianchi@unito.it (F.T.B.),  
ferdinando.dicunto@unito.it (F.D.C.)

### In Brief

Mutations leading to inactivation of the citron kinase protein (CITK) cause primary microcephaly in humans and rodents. Bianchi et al. find a conserved function for CITK in ensuring genomic stability and show that the neurological phenotype caused by CITK loss can be largely reverted by concomitant inactivation of the TP53 gene.

### Highlights

- CITK is required for chromosome integrity independently of its role in cytokinesis
- CITK binds RAD51 and is required for its normal recruitment to DSBs
- Citron kinase loss leads to TP53-dependent apoptosis of cortical neural progenitors
- TP53 inactivation rescues CITK-dependent microcephaly, ataxia, and epilepsy

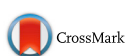

# Citron Kinase Deficiency Leads to Chromosomal Instability and TP53-Sensitive Microcephaly

Federico Tommaso Bianchi,<sup>1,8,\*</sup> Chiara Tocco,<sup>1</sup> Gianmarco Pallavicini,<sup>1,8</sup> Yifan Liu,<sup>1</sup> Fiammetta Verni,<sup>2</sup> Chiara Merigliano,<sup>2</sup> Silvia Bonaccorsi,<sup>2</sup> Nadia El-Assawy,<sup>3</sup> Lorenzo Priano,<sup>3,5</sup> Marta Gai,<sup>1</sup> Gaia Elena Berto,<sup>1,8</sup> Alessandra Maria Adelaide Chiotto,<sup>1,8</sup> Francesco Sgrò,<sup>1</sup> Alessia Caramello,<sup>1</sup> Laura Tasca,<sup>1,8</sup> Ugo Ala,<sup>1</sup> Francesco Neri,<sup>4</sup> Salvatore Oliviero,<sup>4</sup> Alessandro Mauro,<sup>3,5</sup> Stephan Geley,<sup>6</sup> Maurizio Gatti,<sup>2,7</sup> and Ferdinando Di Cunto<sup>1,8,9,\*</sup>

<sup>1</sup>Department of Molecular Biotechnology and Health Sciences, University of Turin, 10126 Turin, Italy

<sup>2</sup>Department of Biology and Biotechnology “Charles Darwin,” Sapienza University, 00185 Rome, Italy

<sup>3</sup>Department of Neurology and Neurorehabilitation, San Giuseppe Hospital, Istituto Auxologico Italiano IRCCS, 28824 Piacavallo (VB), Italy

<sup>4</sup>Human Genetics Foundation (HuGeF), via Nizza 52, 10126 Torino, Italy

<sup>5</sup>Department of Neuroscience, University of Torino, 10126 Torino, Italy

<sup>6</sup>Division of Molecular Pathophysiology, Biocenter, Medical University of Innsbruck, 6020 Innsbruck, Austria

<sup>7</sup>Institute of Molecular Biology and Pathology (IBPM), CNR, 00185 Rome, Italy

<sup>8</sup>Neuroscience Institute Cavalieri Ottolenghi, University of Turin, 10043 Orbassano (TO), Italy

<sup>9</sup>Lead Contact

\*Correspondence: federico.bianchi@unito.it (F.T.B.), ferdinando.dicunto@unito.it (F.D.C.)

<http://dx.doi.org/10.1016/j.celrep.2017.01.054>

## SUMMARY

Mutations in citron (*CIT*), leading to loss or inactivation of the citron kinase protein (CITK), cause primary microcephaly in humans and rodents, associated with cytokinesis failure and apoptosis in neural progenitors. We show that CITK loss induces DNA damage accumulation and chromosomal instability in both mammals and *Drosophila*. CITK-deficient cells display “spontaneous” DNA damage, increased sensitivity to ionizing radiation, and defective recovery from radiation-induced DNA lesions. In CITK-deficient cells, DNA double-strand breaks increase independently of cytokinesis failure. Recruitment of RAD51 to DNA damage foci is compromised by CITK loss, and CITK physically interacts with RAD51, suggesting an involvement of CITK in homologous recombination. Consistent with this scenario, in doubly *CitK* and *Trp53* mutant mice, neural progenitor cell death is dramatically reduced; moreover, clinical and neuroanatomical phenotypes are remarkably improved. Our results underscore a crucial role of *CIT* in the maintenance of genomic integrity during brain development.

## INTRODUCTION

Congenital microcephaly (CM) is a heterogeneous group of disorders characterized by reduced head circumference at birth to at least three SDs below the mean (Barbelanne and Tsang, 2014; Cox et al., 2006; Mahmood et al., 2011; Passemard et al., 2013; Woods and Parker, 2013). CM can be the result of non-genetic conditions, such as viral infections or toxic exposure, or can be generated by rare genetic disorders, usually characterized by

autosomal recessive inheritance (Passemard et al., 2013). For example, a severe CM has been observed in individuals bearing mutations in genes involved in DNA repair, centrosome function, microtubule organization, and spindle orientation (Faheem et al., 2015; Morris-Rosendahl and Kaindl, 2015). In primary hereditary microcephaly (MCPH), brain volume reduction is the main clinical phenotype, associated with conserved brain architecture and mild to moderate intellectual disability (Kaindl et al., 2009; Passemard et al., 2013).

Recent studies have identified mutations of the *CIT* gene, leading to loss or inactivation of the citron rho-interacting serine/threonine kinase (henceforth designated as CITK) in patients affected by severe microlissencephaly (Basit et al., 2016; Harding et al., 2016; Li et al., 2016; Shaheen et al., 2016), with strong neuron depletion and a high frequency of binucleated cells (Harding et al., 2016). Consistent with these findings, previous reports had demonstrated that CITK loss in mice and rats (*CitK*  $-/-$ ) causes a dramatic form of microcephaly, disproportionate with respect to body size, and an association with ataxia and epilepsy leading to perinatal death (Di Cunto et al., 2000; Sarkisian et al., 2002). In these animal models, neuronal loss is primarily due to massive apoptosis, occurring throughout brain development (Ackman et al., 2007; Di Cunto et al., 2000; Sarkisian et al., 2002; Sgrò et al., 2016).

CITK is a conserved protein involved in midbody maturation and cytokinetic abscission, from insects to mammals (D’Avino et al., 2004; Naim et al., 2004). In *CitK*  $-/-$  mice, cytokinesis failure occurs with high penetrance in neuronal progenitors (Di Cunto et al., 2000; Gai et al., 2011), producing binucleated and polyploid cells. It has therefore been postulated that apoptosis from CITK loss is a consequence of impaired cytokinesis (Di Cunto et al., 2000). However, studies performed in many different models indicate that cytokinesis failure leads more frequently to cell cycle arrest than apoptosis (Ganem et al., 2014; Panopoulos et al., 2014). Thus, it is possible that cytokinesis failure and apoptosis are two independent consequences

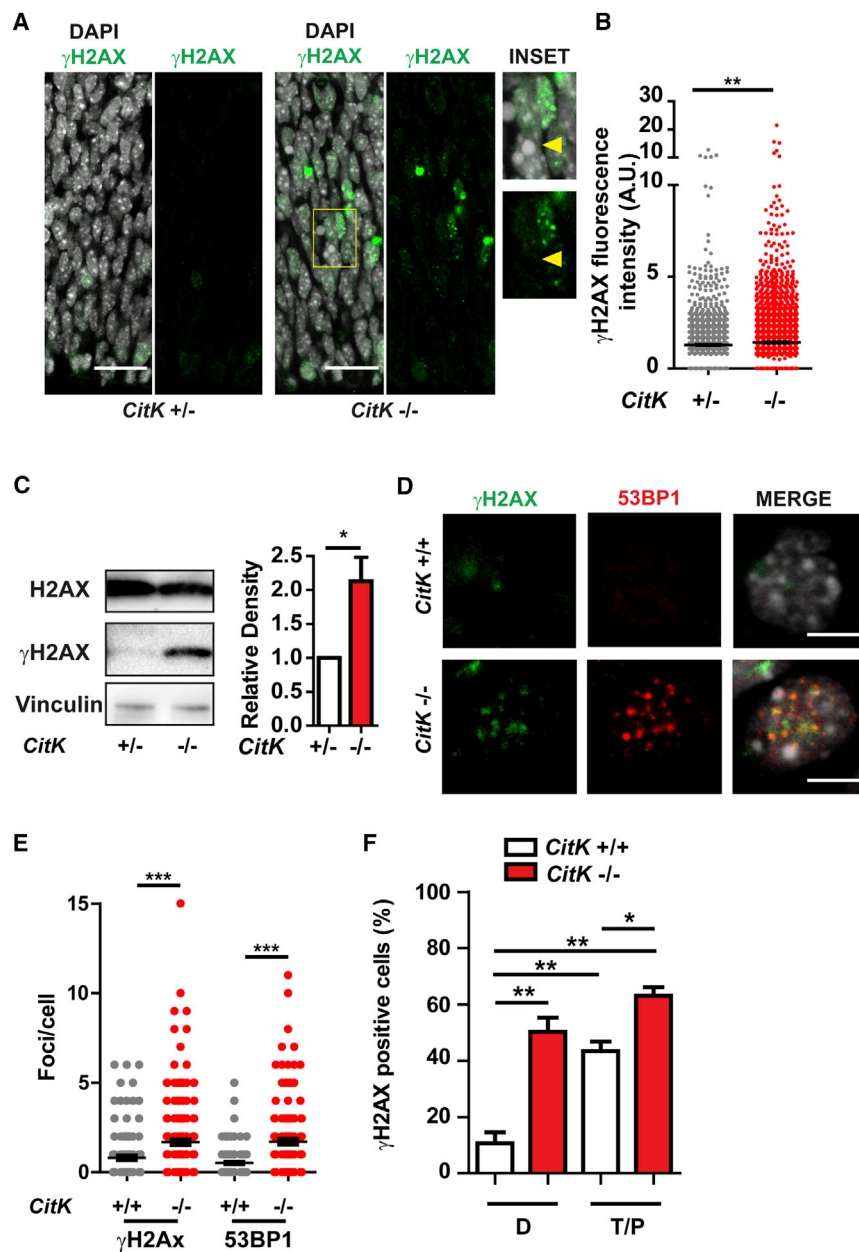

**Figure 1. CITK Prevents DNA Damage Accumulation in the Developing Nervous System**

(A) Cerebral cortex sections of E14.5 mouse embryos stained anti- $\gamma$ H2AX antibodies and DAPI. The scale bars represent 25  $\mu$ m.

(B) Quantification of  $\gamma$ H2AX fluorescence intensity per cell in sections obtained as in (A).

(C) Western blots of cell lysates from P4 cerebella of *CitK* -/- and control mice (+/+ and +/-) probed with anti-H2AX and anti- $\gamma$ H2AX antibodies. Quantification of the  $\gamma$ H2AX/H2AX ratio is shown.

(D) NPCs from E12.5 embryo cortices stained for  $\gamma$ H2AX (green), 53BP1 (red), and DNA (DAPI, blue). The scale bars represent 10  $\mu$ m.

(E) Quantification of  $\gamma$ H2AX foci or 53BP1 foci per cell in NPCs.

(F) Cells stained as in (D) were classified as diploid (D) or tetraploid/polyploid (T/P) by quantification of the DAPI signal (see [Experimental Procedures](#)) and as  $\gamma$ H2AX positive if they displayed more than five foci/cell.

Two tails unpaired Student's t test was used for the statistical analysis of these experiments (n = 3–6 per group). Graphs show mean  $\pm$  SEM. \*p < 0.05; \*\*p < 0.01; \*\*\*p < 0.001.

immunofluorescence to visualize nuclear foci of phosphorylated histone H2AX ( $\gamma$ H2AX), an established marker of DNA damage (Turinetto and Giachino, 2015). This analysis revealed that the developing neocortex of *CitK* -/- mice exhibits a significant increase in cells with high content of  $\gamma$ H2AX foci (Figures 1A and 1B). At embryonic day 14.5 (E14.5), frequent  $\gamma$ H2AX-positive cells are found in ventricular and subventricular regions (Figure 1A), which contain most cortical mitotic cells, but also in the intermediate region and cortical plate (not shown), which contain post-mitotic and differentiating cells. Notably, most cortical cells with bright nuclear  $\gamma$ H2AX do not show apoptotic morphology, whereas the majority of apoptotic nuclei are  $\gamma$ H2AX negative

(Figure 1A), suggesting that the increase of  $\gamma$ H2AX is not a secondary effect of apoptosis induction. Western blot analysis showed that *CitK* -/- mice have significantly increased levels of  $\gamma$ H2AX in the developing cerebellum (Figure 1C), which is the tissue most severely affected by CITK loss (Di Cunto et al., 2000). In addition, developing cortices of *CitK* -/- mice display a significant increase of nuclei with 53BP1 foci (Figure S1A), suggesting that the accumulation of  $\gamma$ H2AX may derive from increased DNA double-strand breaks (DSBs) (Schultz et al., 2000).

## RESULTS

### CITK Is Required for DNA Integrity in Developing Mouse Brain

Because, in microcephaly models, apoptosis has frequently been associated with DNA damage (Passemard et al., 2013) and because DNA damage seems to occur at increased frequency in polyploid cells (Zhang et al., 2013), we asked whether developing brains of *CitK* -/- mice show more DNA lesions than littermate controls. To detect these lesions, we used quantitative

immunofluorescence to visualize nuclear foci of phosphorylated histone H2AX ( $\gamma$ H2AX), an established marker of DNA damage (Turinetto and Giachino, 2015). This analysis revealed that the developing neocortex of *CitK* -/- mice exhibits a significant increase in cells with high content of  $\gamma$ H2AX foci (Figures 1A and 1B). At embryonic day 14.5 (E14.5), frequent  $\gamma$ H2AX-positive cells are found in ventricular and subventricular regions (Figure 1A), which contain most cortical mitotic cells, but also in the intermediate region and cortical plate (not shown), which contain post-mitotic and differentiating cells. Notably, most cortical cells with bright nuclear  $\gamma$ H2AX do not show apoptotic morphology, whereas the majority of apoptotic nuclei are  $\gamma$ H2AX negative

(Figure 1A), suggesting that the increase of  $\gamma$ H2AX is not a secondary effect of apoptosis induction. Western blot analysis showed that *CitK* -/- mice have significantly increased levels of  $\gamma$ H2AX in the developing cerebellum (Figure 1C), which is the tissue most severely affected by CITK loss (Di Cunto et al., 2000). In addition, developing cortices of *CitK* -/- mice display a significant increase of nuclei with 53BP1 foci (Figure S1A), suggesting that the accumulation of  $\gamma$ H2AX may derive from increased DNA double-strand breaks (DSBs) (Schultz et al., 2000).

To elucidate the relationship between DSB accumulation and cytokinesis failure in *CitK* -/- brains, we examined cultures of cortical neural progenitor cells (NPCs) obtained from E12.5

embryos. Compared to the developing tissue, these cells allow better analysis of  $\gamma$ H2AX and 53BP1 foci, as well as definition of nuclear morphology and DNA content. *CitK*<sup>-/-</sup> NPCs show a significant increase of  $\gamma$ H2AX and 53BP1 foci compared to *CitK*<sup>+/+</sup> controls (Figures 1D and 1E). Moreover, most 53BP1 foci are also positive for  $\gamma$ H2AX staining (Figure 1D), consistent with an increase in DSBs frequency in *CitK*-depleted cells. We next asked whether DNA damage accumulation in *CitK*<sup>-/-</sup> NPCs correlates with cytokinesis failure. As previously observed in vivo (Di Cunto et al., 2000), NPC cultures from *CitK*<sup>-/-</sup> embryos show a high frequency of binucleated cells and of cells with large nuclei and an increased DNA content, which are likely to result from one or multiple rounds of cytokinesis failures (Figures S1B and S1C). In control cells, the fraction of nuclei with more than five  $\gamma$ H2AX foci is significantly higher in tetraploid/polyploid cells compared to diploid cells (Figure 1F). Moreover, tetraploid/polyploid cells of *CitK*<sup>-/-</sup> cultures show an even higher prevalence of  $\gamma$ H2AX positivity compared to tetraploid/polyploid controls (Figure 1F). Interestingly enough, diploid *CitK*<sup>-/-</sup> cells also show a significant increase in the frequency of  $\gamma$ H2AX-positive nuclei compared to diploid control cells (Figure 1F). To further elucidate this finding, we analyzed the prevalence of  $\gamma$ H2AX-positive nuclei in post-mitotic neurons and in proliferating progenitors, identified by immunostaining with the markers TuJ (TUBB3) and Nestin, respectively (Figures S1D–S1G). This analysis revealed that 58% of *CitK*<sup>-/-</sup> diploid precursors and 34% of *CitK*<sup>-/-</sup> diploid neurons show more than five foci per nucleus, whereas in the diploid control cells, these frequencies are 17% and 8%, respectively (Figures S1D–S1G). Thus, in developing *CitK*<sup>-/-</sup> NPCs, a significant accumulation of DNA lesions occurs in both proliferating and differentiating diploid cells. Because mouse diploid cells are most likely generated by normal cytokinesis, these results suggest that a large fraction of the DSBs burden that characterizes *CitK*<sup>-/-</sup> neural progenitors is unrelated to cytokinesis failure.

### The Role of CITK in Maintenance of Genome Integrity Is Phylogenetically Conserved and Unrelated to Cytokinesis Control

To assess whether CITK loss leads to increased DNA damage also in human cells, we used RNAi to induce CITK depletion in the TP53-proficient medulloblastoma cell line ONS-76 (Moriuchi et al., 1997). We chose these cells because they closely resemble cerebellar granule progenitors, which are severely affected by CITK loss also in humans (Harding et al., 2016). Similar to mouse NPCs, CITK-depleted ONS-76 cells (Figure S2A) display significant increase in  $\gamma$ H2AX foci (Figure S2B), as compared to cells expressing control small interfering RNA (siRNA). To evaluate whether the DNA damage detected by  $\gamma$ H2AX accumulation leads to chromosome instability, we analyzed metaphase chromosome of CITK-depleted and control ONS-76 cells 48 hr after siRNA transfection. Metaphases of cells transfected with control siRNA show a hyper-triploid chromosome number (range between 74 and 80 chromosomes), with low frequency of chromosome aberrations (CABs) (Figures 2A and 2B). In contrast, metaphases of CITK-depleted ONS-76 cells bearing a chromosome number similar to control cells (which therefore did not fail cytokinesis in the previous mitosis) show a significant increase of CABs (Figures 2A and 2B). This result

further indicates that CITK loss favors the accumulation of DSBs independently of cytokinesis failure.

As long as CITK serves an evolutionarily conserved function in the control of final cytokinesis events (D'Avino et al., 2004; Gai et al., 2011; Naim et al., 2004), we asked whether its protective role from DNA damage is also conserved. We thus investigated *Drosophila* larval brains for the presence of DNA damage foci by immunostaining for the histone variant  $\gamma$ H2Av (the *Drosophila* ortholog of mammalian  $\gamma$ H2AX). We compared wild-type larval brains with brains from larvae homozygous for either *dck*<sup>1</sup> or *dck*<sup>2</sup>, two mutant alleles in the *Drosophila citron kinase* gene (also called *sticky*; see FlyBase; D'Avino et al., 2004; Naim et al., 2004). Because both mutations cause cytokinesis failures, in our comparative analyses, we only considered mutant nuclei that were likely to be diploid. In *dck*<sup>1</sup> and *dck*<sup>2</sup> mutant brains, diploid nuclei with six or more  $\gamma$ H2Av foci are significantly more frequent (84% and 80%, respectively) compared to wild-type (12%; Figures 2C and 2D). To confirm and extend these results, we examined diploid metaphases from both wild-type and *dck* mutant brains for the presence of CABs. Consistent with our previous results (Marzio et al., 2014; Mengoli et al., 2014), wild-type brains show a very low CABs frequency (~0.003/metaphase). In contrast, brains from larvae homozygous for either *dck* mutant allele displayed a 4-fold increase in the CABs frequency compared to controls (Figures 2E and 2F). Remarkably, the observed increases in the CABs frequencies are comparable with those seen for DNA repair foci. Because both  $\gamma$ H2Av repair foci and CABs are thought to be generated by DSBs (Durante et al., 2013; Polo and Jackson, 2011), it is likely that wild-type *dck* protects cells from this type of DNA lesion.

The finding that increases in both foci and CABs are found in diploid cells rules out the possibility that they are the consequence of defects in cytokinesis. Consistent with this conclusion, diploid cells from larval brains of other *Drosophila* mutants strongly defective in cytokinesis did not show any increase in CABs compared to wild-type controls. For example, in mutants in *spaghetti squash* (*sqh*) (encoding a regulatory light chain of the nonmuscle type 2 myosin; Karess et al., 1991) or *twinstar* (*tsr*) (that encodes a *Drosophila* cofilin/ADF homolog; Gunsalus et al., 1995), the frequencies of CABs were not significantly different from controls (Figure 2F; 0.003 and 0.002 CABs/cell for *sqh* and *tsr*, respectively; 500 metaphases from at least eight brains examined in each mutant).

To obtain further insight into the mechanisms underlying generation of DNA damage in *dck* mutants, we asked whether they are sensitive to X-rays, which directly induce DNA breaks. Following irradiation (IR) (2.5 Gy), diploid cells of *dck* mutants show a 2-fold increase in the CABs frequency compared to controls (Figure 2F). Collectively, these results suggest that *dck* is involved in repair of DSBs and indicate that this role in maintenance of genome integrity is independent of its well-known function in cytokinesis completion (Bassi et al., 2011; D'Avino et al., 2004; Gai et al., 2011; Naim et al., 2004).

### CITK Is Critical for Recovery from DNA Damage and for RAD51 Recruitment at DSBs

To further analyze the role of CITK in DNA damage response, we used HeLa cells, which are known to be sensitive to CITK

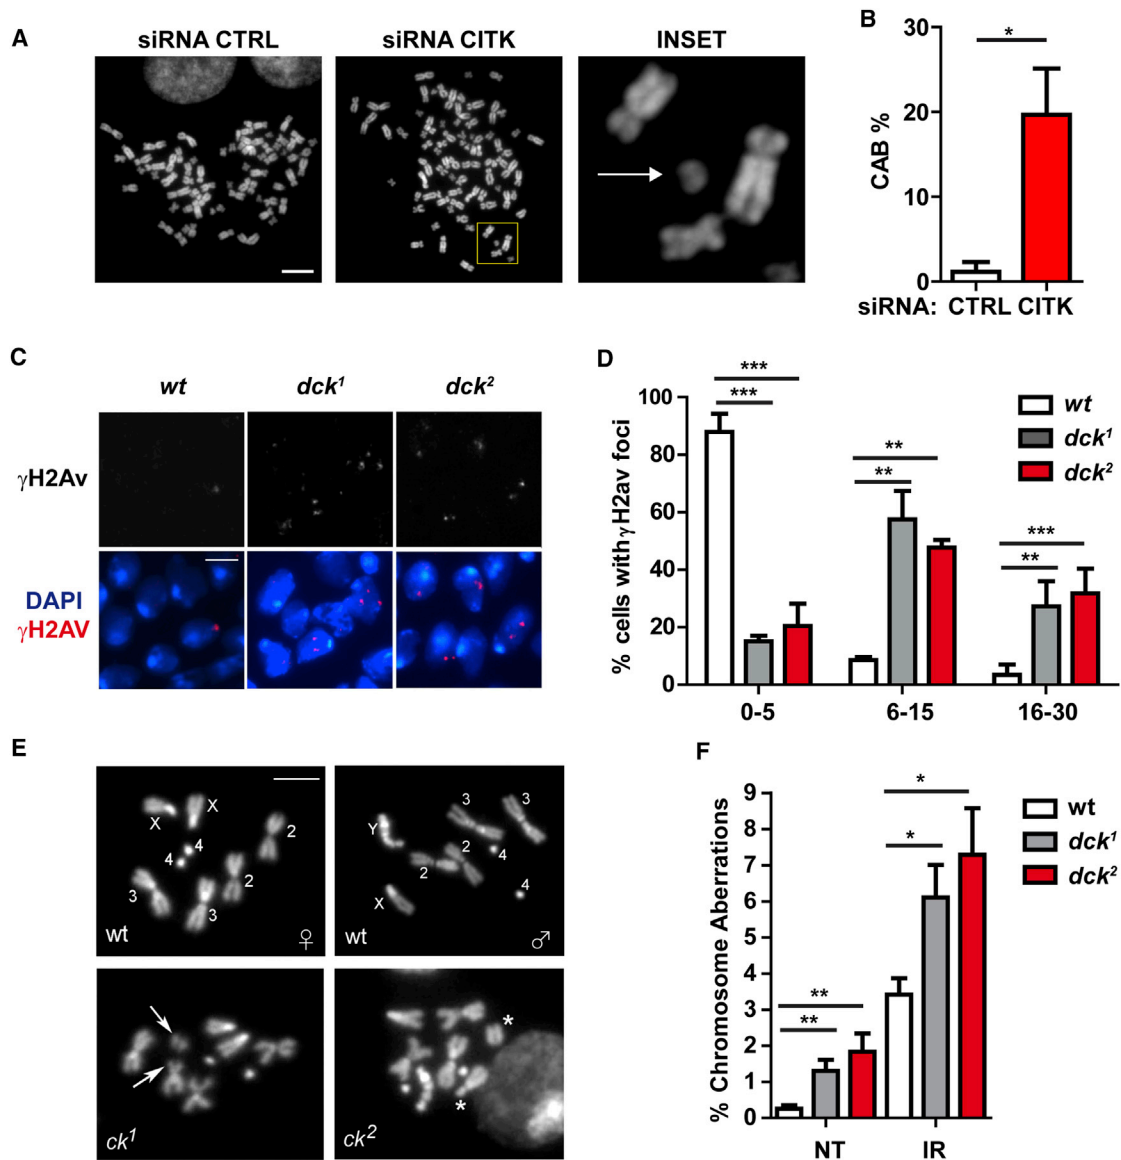

**Figure 2. CITK Has a Phylogenetically Conserved Role in Maintenance of Genome Integrity**

(A) DAPI-stained metaphase spreads from control and CITK-depleted ONS-76 cells. An acentric isochromatid fragment is indicated in the inset (arrow). (B) Frequencies of CABs in mock-treated or CITK-depleted ONS-76 metaphases. (C) *Drosophila* brain squashes from wild-type (wt) *dck<sup>1</sup>* and *dck<sup>2</sup>* mutant larvae stained with anti- $\gamma$ H2Av antibodies and DAPI. (D) Frequencies of negative (0–5  $\gamma$ H2Av foci/cell), moderately positive (6–15 foci/cell), or strongly positive (>15 foci/cell) cells in the samples shown in (C). (E) Diploid DAPI-stained metaphase spreads from control (wt) and mutant (*dck<sup>1</sup>* and *dck<sup>2</sup>*) *Drosophila* larval brains showing broken chromosomes (arrows and stars). (F) Frequencies of chromosome aberrations (CABs) in untreated (NT) or irradiated (IR) (4Gy of X-rays) diploid larval brain cells from wild-type or *dck* mutant larvae. The scale bars in (A) and (C) represent 5  $\mu$ m. Two tails unpaired Student's t test was used for the statistical analysis of these experiments (n = 3–4 per group). Graphs show mean  $\pm$  SEM. \*p < 0.05; \*\*p < 0.01; \*\*\*p < 0.001.

depletion (Gai et al., 2011; McKenzie and D'Avino, 2016). We found that RNAi-mediated CITK deficiency increases the number of  $\gamma$ H2AX and 53BP1 foci in mononucleated HeLa cells, although to a lesser extent than in NPCs (Figures 3A–3D). DSBs accumulation is already detectable 48 hr after siRNA transfection, a time at which CITK is depleted (Gai et al., 2011), but the cell cycle profile is not yet perturbed by the occurrence

of cytokinesis failure (Figure S2D) and accumulation of cells in mitosis (Figure S2E).

To investigate the role of CITK in the recovery from DNA damage induced by ionizing radiations (IRs), control and CITK-depleted HeLa cells were irradiated (4 Gy) and analyzed over 24 hr for the formation and dissolution of  $\gamma$ H2AX and 53BP1 foci. After 30 min post-IR, CITK-depleted cells showed a

significantly higher frequency of foci compared to mock-treated cells (Figures 3A–3D). Moreover, DNA-damage foci resolved with a slower kinetic than in controls (Figures 3A–3D). The increased sensitivity of CITK-depleted HeLa cells to IR seems not to be affected by cell cycle stage, as increased frequency of foci is observed in both cyclin-B1-negative cells (which are mostly in G1/S phase) and cyclin-B1-positive cells (which are mostly in G2; Figures S2F and S2G). CITK-depleted cells showed reduced plating efficiency in a clonogenic survival assay (Figure 3E), as well as a reduced growth potential when treated with different doses of X-rays (Figure 3F). Altogether, these results are consistent with a role of CITK in DSBs repair.

DSBs are mainly repaired by the non-homologous end joining (NHEJ) or homologous recombination (HR) pathways (Ceccaldi et al., 2016). CITK was reported to interact with the KIF4A chromokinesin (Maliga et al., 2013) and with CDKN1B (P27) (Serres et al., 2012), both implicated in HR (See et al., 2010; Wu et al., 2008), suggesting that also CITK could play a role in this process. To investigate the involvement of CITK in proximal DSBs repair events, we evaluated whether 53BP1 (early DSBs marker; Panier and Boulton, 2014), Phospho-RPA (P-RPA), or RAD51 (which both bind sequentially to single-strand DNA during HR; Cejka, 2015) are normally recruited to  $\gamma$ H2AX foci in nuclei of IR-treated CITK-depleted and control cells. No differences were observed in relative intensities and co-localization of 53BP1 and  $\gamma$ H2AX foci (Figures S3A–S3C) or of P-RPA and  $\gamma$ H2AX foci (Figures S3D and S3E), suggesting that the molecular events comprised from early DSBs recognition to end resection are not perturbed by CITK loss. In contrast, in CITK-depleted cells, the intensity of RAD51 signals (Figure 4A and 4D) and the  $\gamma$ H2AX/RAD51 fluorescence ratio (Figure 4E) are both substantially reduced compared to controls. Interestingly, we also found that CITK depletion decreases the fraction of RAD51 signals that co-localize with  $\gamma$ H2AX foci (Figures 4A–4C), as confirmed by quantitative analysis (Figure 4F).

We next asked whether RAD51 recruitment to DSBs is similarly compromised in developing cortex by evaluating the spontaneous DNA-damage foci arising in control and *CitK*<sup>−/−</sup> NPCs. Also in this case, we observed a reduced  $\gamma$ H2AX/RAD51 fluorescence ratio (Figures 4G and 4H), which is not due to a reduction in the RAD51 intracellular level. Indeed, in developing neural tissues of *CitK*<sup>−/−</sup> mice, the RAD51 protein levels are not significantly reduced compared to controls (Figure S3D) as also occurs in CITK-depleted cell cultures (data not shown). To further elucidate the interplay between CITK and RAD51, we explored the possibility that they can form protein complexes. We found that both overexpressed and endogenous CITK can be detected in endogenous RAD51 immunoprecipitations (Figures 4I–4J). The association of the two proteins is not mediated by DNA, as it is not affected by DNase treatment (Figure S4A). However, endogenous RAD51 could be detected in CITK immunoprecipitates only when CITK was overexpressed (Figure S4B). Interestingly, endogenous RAD51 can interact even more efficiently with CITN (an isoform of *CIT* lacking the amino-terminal kinase domain; Madaule et al., 1995) and with a kinase-dead mutant of CITK (Figure S4C), indicating that the catalytic activity of CITK may modulate the CITK-RAD51 interaction. Altogether,

these results suggest that CITK may participate in HR pathway by promoting RAD51 accumulation at end-resected DSB.

### CITK Loss Leads to Neural Progenitors' Apoptosis through TP53 Activation

Consistent with the increased levels of DNA damage in CITK-depleted cells, the developing cerebellum of *CitK*<sup>−/−</sup> mice displayed an increased activation (phosphorylation) of the ATM kinase compared to non-mutant tissues (Figures S5A and S5B). ATM activation is accompanied by a strong increase of the TP53 phosphorylation at Ser-15 (Figure 5A), a post-translational modification that strongly correlates with TP53 activation (Shieh et al., 1999). These results suggest that the DNA damage arising in developing *CitK*<sup>−/−</sup> brains leads to TP53 activation and TP53-dependent apoptosis of neural progenitors and neurons.

To test this possibility, we crossed *CitK* knockout mice into a *Trp53*-null background (Jacks et al., 1994). The intercross of the two knockout lines produces all possible genotypes with the expected Mendelian frequencies (data not shown). Morphological examination of *CitK Trp53* double-knockout (DKO) brains revealed a significant increase in brain size compared with *Trp53*-proficient *CitK*<sup>−/−</sup> animals, although DKO brains are still smaller than littermate controls (Figure 5B). Consistent with this finding, histological examination of DKO mice revealed a significant recovery of cortical (Figure S6A) and cerebellar granular layer thickness (Figure S6B), correlated with good recovery of Purkinje cells' lining and dendritic arborization (Figure 5C). We also observed a dramatic recovery of calretinin-positive GABAergic interneurons throughout the cortex (Figure 5D) and of olfactory granules' precursors in rostral migratory stream (Figure S6C). Finally, the number of granule cells in the dentate gyrus of the hippocampus is increased, whereas the structure appears to be disorganized (Figure S6D).

To investigate whether the anatomical rescue obtained by TP53 loss in *CitK*<sup>−/−</sup> animals is due to reduced apoptosis, TUNEL assay was performed on developing brains. The frequency of apoptotic cells was dramatically reduced in both cerebellum (Figure 6A) and telencephalon (Figure 6B) of DKO mice compared to *CitK*<sup>−/−</sup> *Trp53*<sup>+/-</sup> mice.

Conversely, histological examination (Figure 6C) and flow cytometry (Figure 6D) revealed that DKO brains exhibit frequencies of binucleated/multinucleated cells even higher than those seen in *CitK*<sup>−/−</sup> *Trp53*<sup>+/-</sup> mice. Similarly, the frequency of aberrant mitoses, such as tripolar metaphases and anaphases, was strongly increased in DKO brains compared to both *CitK*<sup>+/-</sup> *Trp53*<sup>+/-</sup> control brains and *CitK*<sup>−/−</sup> *Trp53*<sup>+/-</sup> brains (Figures 6E and 6F). Importantly, developing cerebellum and neocortex of DKO mice showed levels of DNA damage ( $\gamma$ H2AX levels) and ATM activation comparable to those detected in *TP53*-proficient *CitK*<sup>−/−</sup> samples (Figures S7 and S5, respectively), providing further support to the conclusion that DNA damage is a primary outcome of CITK deficiency and not a consequence of apoptosis.

### CITK Loss Activates TP53-Dependent and TP53-Independent Transcriptional Responses

To further characterize the molecular events produced by CITK loss, we used RNA sequencing (RNA-seq) to compare the

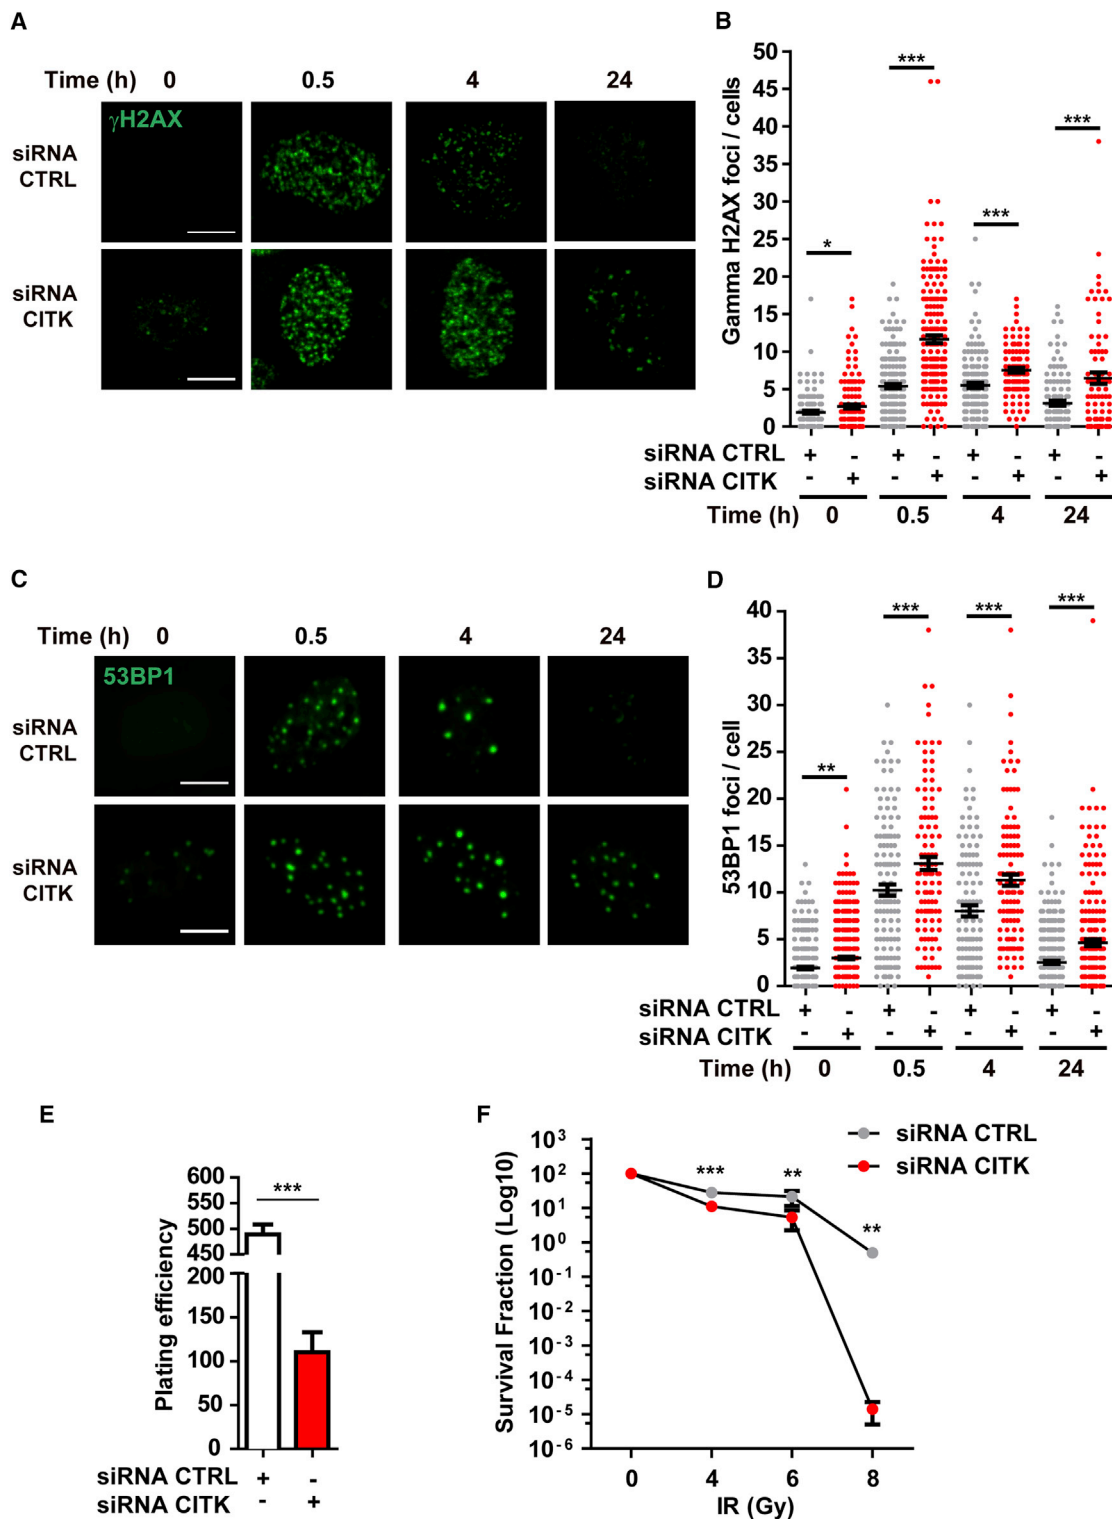

**Figure 3. CITK-Depleted HeLa Cells Display Reduced DNA Damage Recovery and Enhanced Radiosensitivity**

(A) Representative nuclei of HeLa cells transfected with mock siRNA (CTRL) or with CITK-specific siRNAs; cells were irradiated with 4 Gy and stained with anti- $\gamma$ H2AX antibodies at the indicated post-irradiation times.

(B) Quantification of  $\gamma$ H2AX fluorescence intensity per cell in (A).

(C) Representative nuclei of HeLa cells treated as in (A) and stained with anti-53BP1 antibodies at the indicated post-irradiation times.

(legend continued on next page)

gene expression profiles of *CitK*  $-/-$  *Trp53*  $+/-$ , *CitK*  $+/-$  *Trp53*  $-/-$ , and DKO mice with the profile of their *CitK*  $+/-$  *Trp53*  $+/-$  littermates, which were used as controls. As for the biochemical analyses, we analyzed gene expression in the developing cerebellum. Samples were collected at postnatal day 4 (P4), when the ratio between proliferating neuronal precursors and post-mitotic neurons in *CitK* mutant and control mice is still comparable (Di Cunto et al., 2000).

As expected, a comparison of cerebella from the four genotypes revealed that the *CitK* knockout is associated with decreased expression of neurogenesis-related genes, consistent with a strong loss of post-mitotic neurons (Sgrò et al., 2016). Indeed, the keyword “neurogenesis” was the most statistically enriched ( $p = 1.9 \times 10^{-11}$ ) in the annotation of the 354 genes downregulated in *CitK*  $-/-$  *Trp53*  $+/-$  mice compared with their *CitK*  $+/-$  *Trp53*  $+/-$  littermates (Table S1); conversely, the keyword “p53 signaling pathway” was significantly enriched in the upregulated genes ( $p = 7.4 \times 10^{-4}$ ; Table S1). A comparison of DKO samples with *CitK*  $+/-$  *Trp53*  $+/-$  controls or with *CitK*  $+/-$  *Trp53*  $-/-$  samples provided information on the genes whose expression is modulated by CITK loss in a TP53-independent fashion (Table S1). An analysis of the gene lists generated by these comparisons confirmed that the altered expression of neurogenesis genes is not a direct consequence of CITK loss but is instead a likely consequence of TP53-dependent apoptosis. Indeed, only 26 genes were downregulated in DKO samples compared with either *CitK*  $+/-$  *Trp53*  $+/-$  or *CitK*  $+/-$  *Trp53*  $-/-$  samples (Table S1), and these genes did not include a significant number of the neurogenesis functions downregulated in *CitK*  $-/-$  *Trp53*  $+/-$  brains (Table S1). As expected, genes of the TP53-effector pathway are not significantly upregulated in DKO brains (Table S1). In particular, we did not observe upregulation of TP53-related and DNA-damage-related proapoptotic genes, such as *Pmaip1/Noxa* (Oda et al., 2000; Schuler et al., 2003), *Ccnd1* (Kranenburg et al., 1996), *Ccng1* (Okamoto and Prives, 1999), and *Trp53cor1/LincRNA-p21* (Hall et al., 2015; Huarte et al., 2010). However, *Cdkn1a* and *Trp73*, two genes related to DNA damage and to TP53 function, were overexpressed in both DKO and *CitK*  $-/-$  *Trp53*  $+/-$  samples, indicating that their induction by CITK deficiency is largely TP53-independent. *Cdkn1a* induction was confirmed at the protein level (Figure S6C). Interestingly, the other genes upregulated independently of TP53 in CITK-deficient samples include *Wif1*, *S100B*, *MyoD1*, and *Cend1* (Table S1), which are implicated in cell cycle exit. Thus, in parallel with a TP53-dependent apoptotic program, loss of CITK activates a TP53-independent response that may promote cell cycle exit.

### Trp53 Inactivation Restores Clinical and Behavioral Defects of *CitK*-Null Mice

*Trp53*-proficient *CitK*  $-/-$  mice die of lethal epileptic seizures within the first 2 weeks after birth, whereas DKO mice display

strongly improved phenotype, with a lifespan almost indistinguishable from that of their *CitK*  $+/-$  *Trp53*  $-/-$  littermates ( $p = 0.97$ ; Figure 7A). Interestingly, even the deletion of a single *Trp53* allele is sufficient to extend the survival of *CitK*  $-/-$  mice ( $p = 0.0028$ ; Figure 7A). The ataxic phenotype of *CitK*  $-/-$  *Trp53*  $+/-$  mice is largely corrected in their DKO littermates (Movies S1, S2, and S3), which display normal frequency of horizontal movements (Figure 7B) and only a reduction in frequency of vertical movements (Figure 7C). Moreover, electroencephalographic (EEG) recordings are consistent with a strong functional rescue. In particular, in DKO mice, the bursts of high-amplitude poly-spikes that characterize the seizures observed in *CitK*  $-/-$  *Trp53*  $+/-$  mice were completely absent (Figure 7D). Accordingly, we never observed behavioral alterations compatible with seizures. A reduction of the mean dominant frequency (MDF) of theta region was the only difference that we could detect between the EEG pattern of DKO and *CitK*  $+/-$  *Trp53*  $+/-$  mice (Figure 7E).

In conclusion, the recovery of the neurological phenotype in DKO mice indicates that the neural progenitors with abnormal DNA content and elevated DNA damage, which would normally be eliminated through TP53-dependent apoptosis, are capable of differentiating and integrating into relatively normal neural circuits if TP53 is concomitantly lost.

## DISCUSSION

This study provides insight into the role of CITK in cortical development and microcephaly. So far, the phenotype produced by CITK loss has been ascribed to massive apoptosis, directly or indirectly generated by cytokinesis failure (Di Cunto et al., 2000; Cunto et al., 2002; Sarkisian et al., 2002). This view was essentially based on the finding that *CitK*  $-/-$  mice and rats display cytokinesis failure and apoptosis in developing neural tissues (Di Cunto et al., 2000; Cunto et al., 2002; Sarkisian et al., 2002), a phenotype recently confirmed in human microcephaly patients with *CIT/CITK* mutations (Basit et al., 2016; Harding et al., 2016; Li et al., 2016; Shaheen et al., 2016). However, the mechanistic link between cytokinesis failure and apoptosis remained controversial. Data obtained from non-tumorigenic cell lines and from primary cells (Ganem et al., 2014; Kuffer et al., 2013; Panopoulos et al., 2014) indicate that, rather than apoptosis, the main outcome of cytokinesis failure is G1 arrest, produced by TP53 activation (Kuffer et al., 2013), cell senescence (Panopoulos et al., 2014), or activation of the Hippo pathway (Ganem et al., 2014). On the other hand, it is reasonable to hypothesize that cells failing to arrest after abortive cytokinesis would give rise to tetraploid or polyploid cells, which can lead to DNA damage (Ganem and Pellman, 2012; Hayashi and Karlseder, 2013; Zhang et al., 2013) and, consequently, to apoptosis (Hall et al., 2015).

(D) Quantification of  $\gamma$ H2AX fluorescence intensity per cell in (C).

(E) Plating efficiency of control and CITK-depleted HeLa.

(F) Clonogenic survival assay of control and CITK-depleted HeLa cells irradiated with the indicated IR dosage.

Two tails unpaired Student's *t* test was used for the statistical analysis of these experiments ( $n = 3-7$  per group). Graphs show mean  $\pm$  SEM. \* $p < 0.05$ ; \*\* $p < 0.01$ ; \*\*\* $p < 0.001$ .



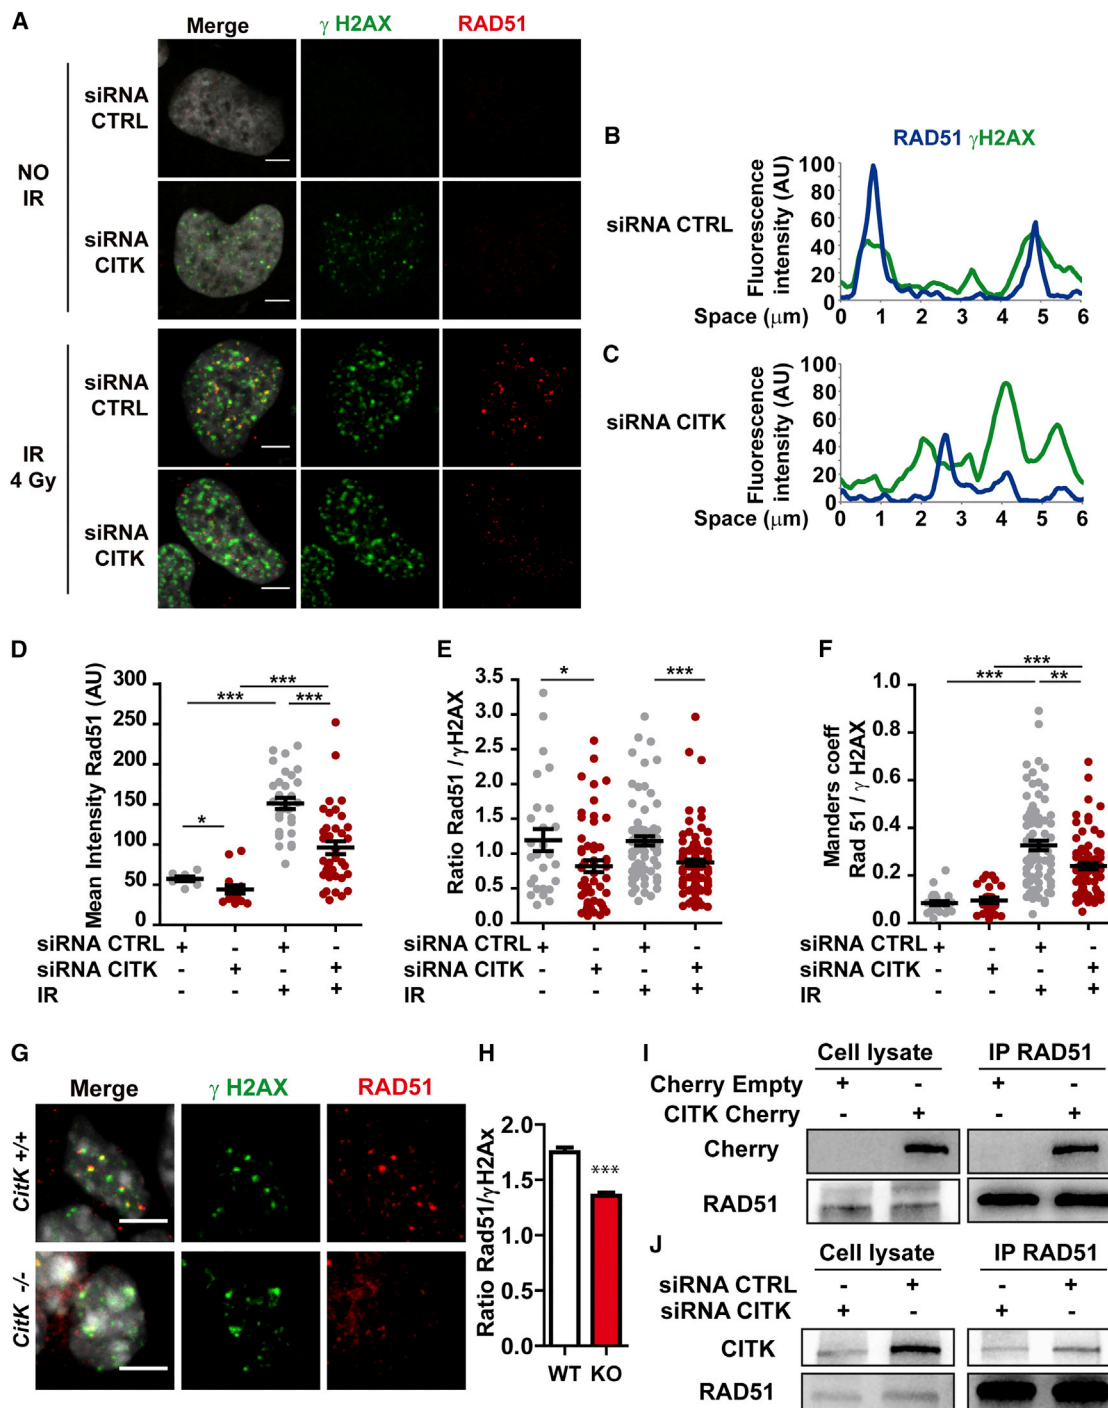

**Figure 4. CITK-Depleted HeLa Cells Are Defective in RAD51, but Not in 53BP1, Recruitment at  $\gamma$ H2AX Foci**

(A) HeLa cells stained with anti- $\gamma$ H2AX and anti-RAD51 antibodies before irradiation or 4 hr after irradiation (X-rays, 4 Gy).

(B and C) Examples of co-localization profiles between  $\gamma$ H2AX and RAD51 signals in HeLa cells treated as in (A). Fluorescence intensity was plotted for the two channels along a 6- $\mu$ m-long line, randomly drawn in the nuclei of exemplar cells.

(D–F) Quantitative analysis of the RAD51 signals in cells treated as in (A); each dot corresponds to one nucleus. The dot plot graphs show the fluorescence intensities of the RAD51 signals (D), the RAD51/ $\gamma$ H2AX fluorescence ratios (E), and a quantification of co-localization of the  $\gamma$ H2AX and RAD51 signals determined by the Manders overlap coefficient (F).

(G) Nuclei from NPCs from E12.5 embryo cortices stained with anti- $\gamma$ H2AX, anti RAD51, and DAPI. The scale bars represent 5  $\mu$ m.

(H) Quantification of the RAD51/ $\gamma$ H2AX fluorescence ratios of (G).

(legend continued on next page)

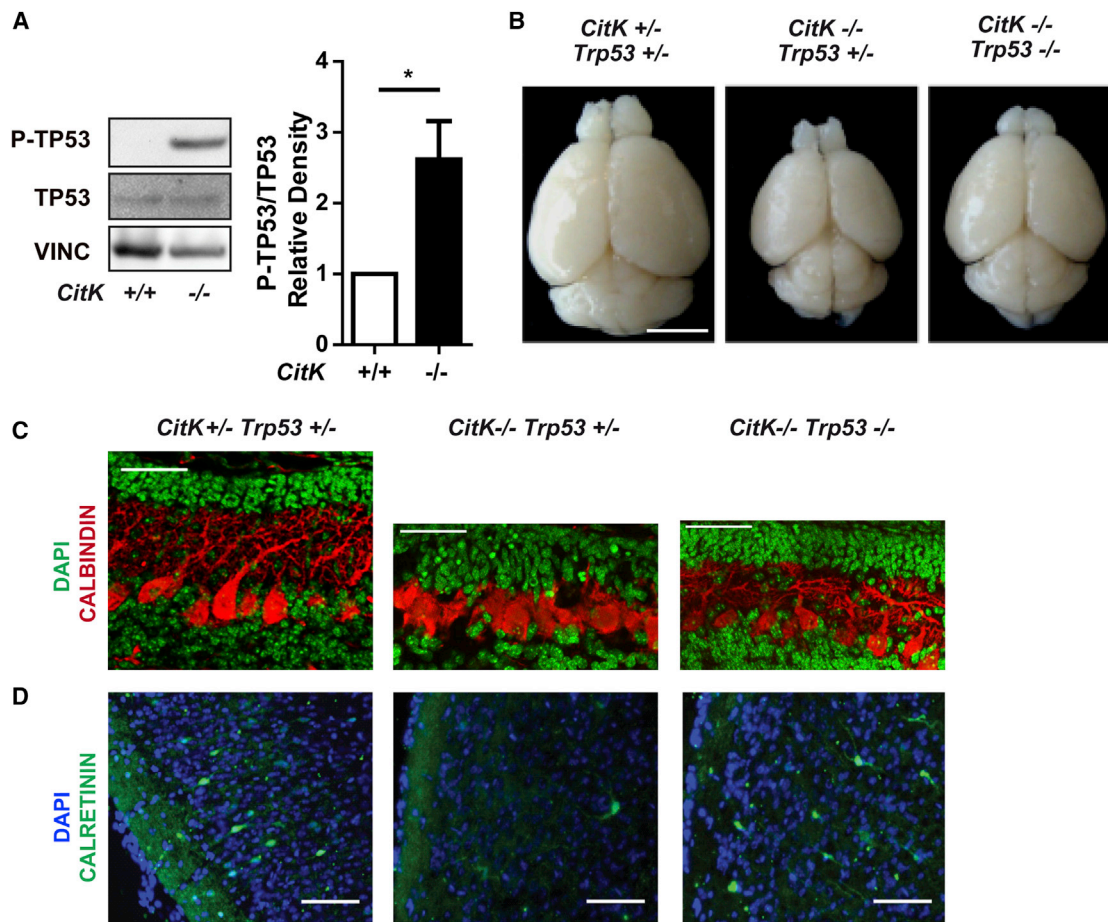

**Figure 5. Neuroanatomical Rescue of the *CitK* Knockout Mice Phenotype by *Tpr53* Deficiency**

(A) Representative western blots of cell lysates of P4 cerebella from *CitK*  $-/-$  and control mice ( $+/+$ ) probed with the indicated antibodies. Quantification of the relative density between P-TP53 and TP53 is shown.  
 (B) Brain morphology in 30-day-old mice of the indicated genotypes.  
 (C) Frozen sections of P8 cerebella from mice of the indicated genotypes stained with anti-calbindin antibodies and DAPI.  
 (D) Frozen sections of neocortex from P21 mice of the indicated genotypes stained with anti-Calretinin antibodies and DAPI.  
 The scale bars correspond to 50  $\mu\text{m}$  in (C) and to 200  $\mu\text{m}$  in (D). Two tails unpaired Student's t test was used for the statistical analysis of these experiments ( $n = 3\text{--}5$  mice per group). Graphs show mean  $\pm$  SEM. \* $p < 0.05$ ; \*\* $p < 0.01$ ; \*\*\* $p < 0.001$ .

We showed that diploid cells from neuronal progenitor cultures from *CitK*  $-/-$  mice exhibit a significant increase in DNA repair foci compared to diploid cells of *CitK*  $+/+$  control mice. Also CITK-depleted cells from human medulloblastoma displayed a substantial increase in the frequencies of CABs, with respect to mock-treated cells. Because the NPC and human medulloblastoma that we analyzed are unlikely to be the products of defective cytokinesis, these results strongly suggest that, in both cell types, DNA damage arises independently of cytokinesis. Moreover, we demonstrated that *Drosophila* diploid cells from

*dck* mutant brains exhibit an increase in both DNA repair foci and CABs compared to diploid cells of wild-type brains. Collectively, these results indicate that, in a variety of systems, depletion of CITK leads to DNA damage independently of cytokinesis.

It has been shown that DNA damage can arise in cells that remain arrested in a prometaphase-metaphase stage for long periods, suggesting that a block in metaphase can cause DNA lesions (Hayashi and Karlseder, 2013; Orth et al., 2012; Pilaz et al., 2016). This possibility, however, is excluded for *Drosophila*, as our previous work showed that diploid cells of *dck*<sup>1</sup> and *dck*<sup>2</sup>

(I) CITK-Cherry or Cherry Empty vectors were overexpressed in 293T cells by transfection, and the lysates were subjected to immunoprecipitation using an anti-RAD51 antibody. Immunoprecipitates (IPs) and whole-cell extracts (cell lysate) were immunoblotted with the indicated antibodies.

(J) Total lysate of ONS-76 medulloblastoma cells, transfected with control or CITK-specific siRNAs, were immunoprecipitated with anti-RAD51 antibodies. Endogenous CITK and RAD51 were then revealed by western blotting (WB). The scale bars represent 5  $\mu\text{m}$ .

Two tails unpaired t test with Welch's correction was used for the statistical analysis of these experiments ( $n = 3\text{--}4$  per group). Graphs show mean  $\pm$  SEM. \* $p < 0.05$ ; \*\* $p < 0.01$ ; \*\*\* $p < 0.001$ .

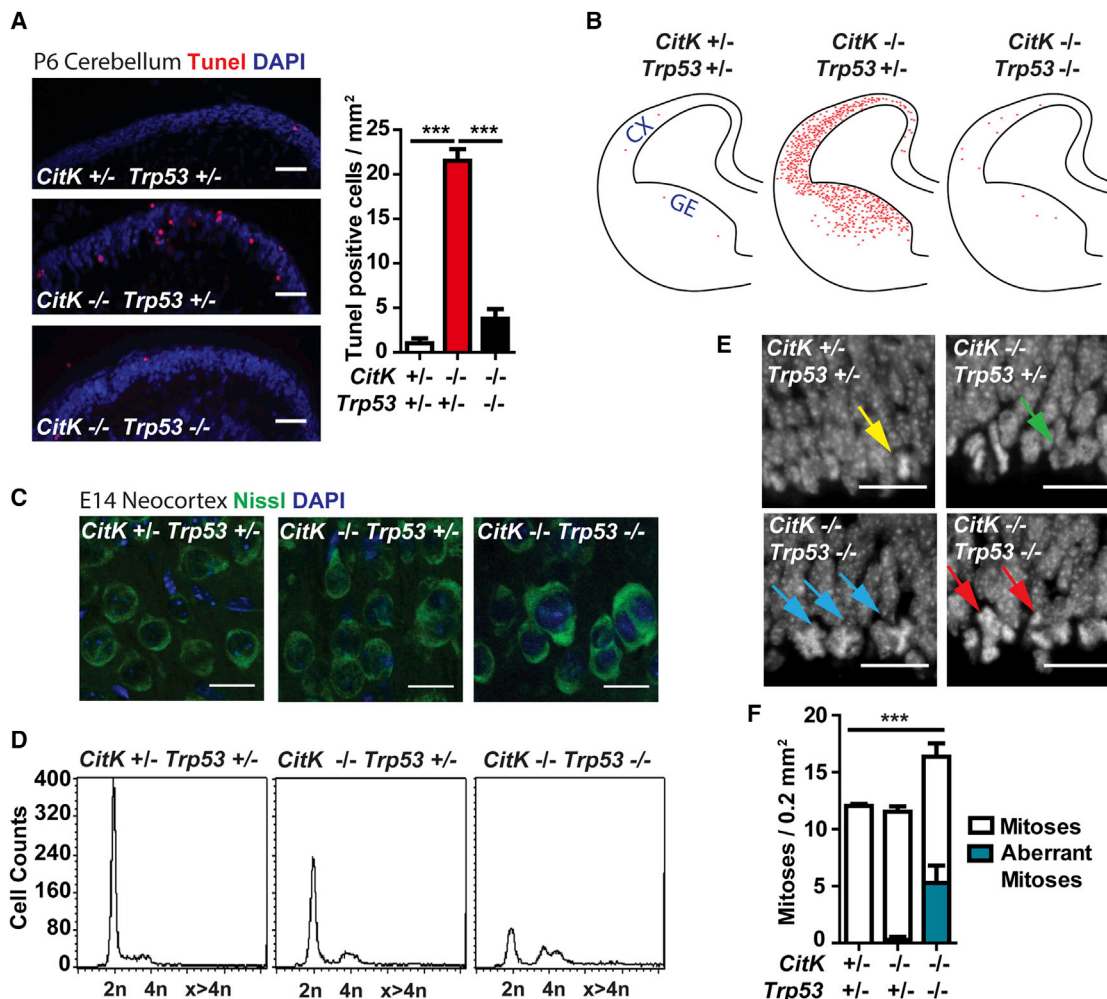

### Figure 6. Apoptosis of *CitK*-Null Neural Progenitors Is TP53 Dependent

(A) Frozen sections of cerebella from P6 mice of the indicated genotypes stained with TUNEL assay (apoptotic cells, red) and DAPI. Quantification of apoptotic cells in the indicated genotypes is shown. The scale bars represent 50  $\mu$ m.

(B) Distribution of TUNEL-positive cells in coronal sections of E14.5 embryonic brains; CX, neocortex; GE, ganglionic eminence.

(C) Examples of cortical plate cells in developing neocortices of mice of the indicated genotypes, stained with Nissl and DAPI. The scale bars represent 25  $\mu$ m.

(D) Flow-cytometric analysis of DNA content in postnatal cortices (P14) from mice of the indicated genotypes.

(E) DAPI-stained ventricular regions of E14.5 cortices from embryos of the indicated genotypes. Note the presence of tripolar metaphases (blue arrows) and anaphases (red arrows); bipolar metaphases and anaphases are indicated by yellow and green arrows, respectively. The scale bars represent 10  $\mu$ m.

(F) Quantification of normal and aberrant mitoses in the samples shown in (E).

Two tails unpaired Student's t test was used for the statistical analysis of these experiments ( $n = 3$  mice per group). Graphs show mean  $\pm$  SEM. \* $p < 0.05$ ; \*\* $p < 0.01$ ; \*\*\* $p < 0.001$ .

mutant brains proceed normally through mitosis; mutant cells show mitotic indices and relative frequencies of prometaphases, metaphases, and anaphases that are fully comparable to those of wild-type controls (Naim et al., 2004). This possibility is also excluded for *CITK*-depleted HeLa cells, as they show DNA damage when the cell cycle is not significantly perturbed (Figure S3). Altogether, these results indicate that the evolutionarily conserved role of *CITK* in the maintenance of DNA integrity is largely independent of its role in cytokinesis.

Abundant evidence indicates that  $\gamma$ H2AX repair foci and CABs are generated by DSBs (Durante et al., 2013; Polo and Jackson,

2011), suggesting that citron kinase protects cells from this type of DNA lesion. How does loss of *CITK* lead to these lesions? In theory, *CITK* loss could increase DSBs formation, decrease DSBs repair, or both. The relatively slow recovery of *CITK*-depleted cells from IR (Figure 3) suggests a deficiency in DSB repair. The reported interaction of *CITK* with KIF4A (Wu et al., 2008) and p27 (Serres et al., 2012) has further suggested that *CITK* may play a role in HR, as both proteins were previously implicated in this pathway. Consistent with this possibility, *CITK*-deficient cells displayed a specific reduction in RAD51 recruitment at  $\gamma$ H2AX foci, whereas they showed normal

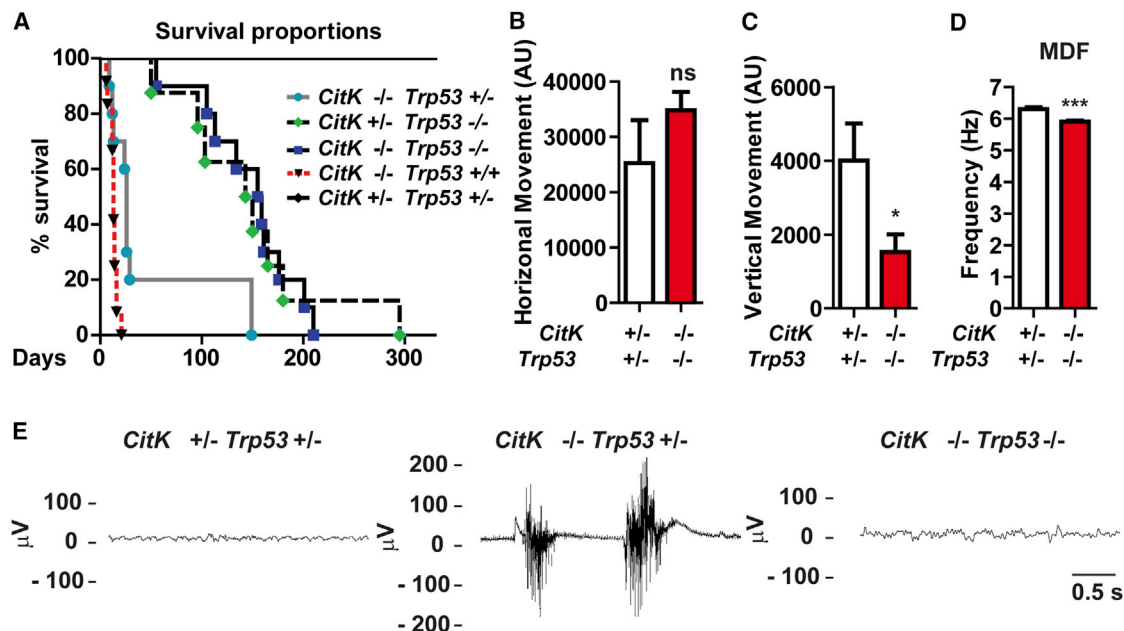

**Figure 7. TP53 Inactivation Rescues the Clinical Phenotype of *CitK* Knockout Mice**

(A) Survival curves of mice of the indicated genotypes.

(B and C) Spontaneous horizontal (B) and vertical (C) movements in 2-month-old mice of the indicated genotypes.

(D) Mean dominant frequency (MDF) of theta band, measured on EEG recording in 4-week-old mice of the indicated genotypes.

(E) EEG recordings in 12-day-old mice of the indicated genotypes.

Two tails unpaired Student's *t* test was used for the statistical analysis of these experiments reported in (B) and (C) (*n* = 3–10 mice per group). Graphs show mean ± SEM. \**p* < 0.05; \*\**p* < 0.01; \*\*\**p* < 0.001; ns, not significant.

recruitment of 53BP1 and P-RPA at these foci. Moreover, CITK and endogenous RAD51 co-purify in immunoprecipitation experiments, either when CITK is overexpressed or when it is present at normal background levels, supporting the idea of a functional interaction between these proteins. However, despite this interaction, we were not able to detect CITK accumulation at  $\gamma$ H2AX foci (data not shown), suggesting that CITK is not directly required for RAD51 recruitment at foci. Our results also suggest that the CITK-RAD51 association can be modulated by CITK kinase activity (Figure S4). A crucial role of CITK catalytic activity would be consistent with the high fraction of kinase-inactivating mutations found in microcephaly patients with mutations in the *CIT/CITK* gene (Basit et al., 2016; Harding et al., 2016; Li et al., 2016; Shaheen et al., 2016). Therefore, it will be very important to determine whether RAD51 is a direct CITK substrate.

Functional impairment of HR due to defective RAD51 recruitment to DNA lesions provides a possible explanation for DSBs formation in CITK-depleted cells. However, it must be considered that DNA lesions and IR sensitivity caused by CITK loss occur not only in cell cycle phases characterized by RAD51 expression but also in G1 and post-mitotic cells, in which RAD51 expression is very low. Therefore, future studies should clarify whether the NHEJ pathway is also compromised by CITK loss.

Our results indicate that pathogenesis of the *CIT/CITK*-dependent microcephaly syndrome is more complicated than previously thought. We have clearly shown that TP53 activation is a fundamental culprit of microcephaly. Indeed, similar to

other mouse models bearing mutations in DNA repair genes (Frank et al., 2000; Frappart et al., 2005; Gao et al., 2000; Pao et al., 2014), apoptosis and most aberrant phenotypic traits of *CitK* <sup>-/-</sup> brains are reverted by TP53 inactivation. In particular, the rescue of lethality correlates with the disappearance of epileptic seizures (Figure 7E) and could be explained by the recovery of GABA-ergic interneurons (Figure 5), which play a crucial role in control of brain excitability (Powell, 2013) and are severely affected by CITK loss (Figure S5; Muzzi et al., 2009). However, despite apoptosis elimination and remarkable neurological recovery, brain volume of *CITK*-null mice is only partially restored by *Trp53* inactivation. This finding suggests that, in *CitK* <sup>-/-</sup> mice, TP53-independent reduction of cell proliferation may contribute to microcephaly. Consistent with this possibility, we detected in DKO developing cerebella a TP53-independent growth-inhibitory signature, characterized by increased p21 and p73 expression. This growth-suppressive program could be activated by cytokinesis failure, as shown in other cell types (Ganem et al., 2014; Panopoulos et al., 2014). However, gene expression analysis in DKO cerebella did not provide specific indications about this issue. In particular, we could not detect a significant activation of the Hippo pathway (Ganem et al., 2014). If growth suppression does not result from cytokinesis failure, it might be triggered by TP53-independent events activated by DNA damage, as those described in mammalian cells treated with mutagens (Reinhardt et al., 2007). Thus, the mechanism underlying the growth-suppressive pathway in *CIT/CITK*-dependent microcephaly remains an open issue.

In conclusion, our study reveals a conserved function for *CIT* in ensuring genomic stability and supports the notion that blocking TP53 signaling during development can attenuate the phenotypic consequences of at least a subset of mutations leading to severe microcephaly.

## EXPERIMENTAL PROCEDURES

### Experimental Animal Work

Experiments involving samples from mutant and control mice have been performed conforming to the Italian laws on animal experimentation and under the supervision of the veterinary service of our animal facility. The corresponding experimental protocols have been approved by the Italian Ministry of Health, Department of Public Veterinary Health with approval number 343/2015-PR, released on 08/05/2015.

### Statistical Analysis

Statistical analyses were performed using Microsoft Office Excel or Graphpad (GraphPad Software). Unpaired Student's *t* test and Welch's unequal variances *t* test was used for *p* values determination. Values represented the mean and the SE of at least three independent experiments.

Additional materials and methods are described in the [Supplemental Experimental Procedures](#).

## SUPPLEMENTAL INFORMATION

Supplemental Information includes Supplemental Experimental Procedures, seven figures, one table, three movies, and a supplemental data file and can be found with this article online at <http://dx.doi.org/10.1016/j.celrep.2017.01.054>.

## AUTHOR CONTRIBUTIONS

Conceptualization, F.T.B., M. Gatti, S.B., A.M., and F.D.C.; Investigation, F.T.B., C.T., Y.L., F.V., C.M., N.E.-A., L.P., M. Gai, G.E.B., A.M.A.C., F.S., G.P., A.C., F.N., and L.T.; Resources, S.G. and S.O.; Formal Analysis, F.T.B., U.A., and F.D.C.; Writing – Original Draft, F.T.B. and F.D.C.; Writing – Review & Editing, F.T.B. and F.D.C.; Supervision, F.D.C.; Funding, M. Gatti, S.B., and F.D.C.

## ACKNOWLEDGMENTS

We thank Dr. Maurizio Giustetto (Department of Neuroscience, Turin) and Dr. Roberto Piva for providing us reagents, Dr. Alessandro Fioravanti and Dr. Juan Carlos Cutrin for the histology, Dr. Paolo Provero for help on the statistical analysis, and Dr. Luigi Varesio (Gaslini Hospital, Genova). This work was supported by the Telethon Foundation through grant nos. GGP12095 and GGP13081 to F.D.C., by the Associazione Italiana per la Ricerca sul Cancro (AIRC) with grants IG17527 to F.D.C. and IG16020 to M. Gatti, and by a PRIN grant to S.B. C.M. was supported by a Teresa Ariaudo fellowship from Istituto Pasteur-Fondazione Cenci Bolognetti.

Received: July 21, 2016

Revised: December 16, 2016

Accepted: January 22, 2017

Published: February 14, 2017

## REFERENCES

Ackman, J.B., Ramos, R.L., Sarkisian, M.R., and Loturco, J.J. (2007). Citron kinase is required for postnatal neurogenesis in the hippocampus. *Dev. Neurosci.* **29**, 113–123.

Barbelanne, M., and Tsang, W.Y. (2014). Molecular and cellular basis of autosomal recessive primary microcephaly. *BioMed Res. Int.* **2014**, 547986.

Basit, S., Al-Harbi, K.M., Alhijji, S.A., Albalawi, A.M., Alharby, E., Eldardear, A., and Samman, M.I. (2016). *CIT*, a gene involved in neurogenic cytokinesis, is mutated in human primary microcephaly. *Hum. Genet.* **135**, 1199–1207.

Bassi, Z.I., Verbrugge, K.J., Capalbo, L., Gregory, S., Montebault, E., Glover, D.M., and D'Avino, P.P. (2011). Sticky/Citron kinase maintains proper RhoA localization at the cleavage site during cytokinesis. *J. Cell Biol.* **195**, 595–603.

Ceccaldi, R., Rondinelli, B., and D'Andrea, A.D. (2016). Repair pathway choices and consequences at the double-strand break. *Trends Cell Biol.* **26**, 52–64.

Cejka, P. (2015). DNA end resection: nucleases team up with the right partners to initiate homologous recombination. *J. Biol. Chem.* **290**, 22931–22938.

Cox, J., Jackson, A.P., Bond, J., and Woods, C.G. (2006). What primary microcephaly can tell us about brain growth. *Trends Mol. Med.* **12**, 358–366.

Cunto, F.D., Imarisio, S., Camera, P., Boitani, C., Altruda, F., and Silengo, L. (2002). Essential role of citron kinase in cytokinesis of spermatogenic precursors. *J. Cell Sci.* **115**, 4819–4826.

D'Avino, P.P., Savoian, M.S., and Glover, D.M. (2004). Mutations in sticky lead to defective organization of the contractile ring during cytokinesis and are enhanced by Rho and suppressed by Rac. *J. Cell Biol.* **166**, 61–71.

Di Cunto, F., Imarisio, S., Hirsch, E., Broccoli, V., Bulfone, A., Migheli, A., Atzori, C., Turco, E., Triolo, R., Dotto, G.P., et al. (2000). Defective neurogenesis in citron kinase knockout mice by altered cytokinesis and massive apoptosis. *Neuron* **28**, 115–127.

Durante, M., Bedford, J.S., Chen, D.J., Conrad, S., Cornforth, M.N., Natarajan, A.T., van Gent, D.C., and Obe, G. (2013). From DNA damage to chromosome aberrations: joining the break. *Mutat. Res.* **756**, 5–13.

Faheem, M., Naseer, M.I., Rasool, M., Chaudhary, A.G., Kumosani, T.A., Ilyas, A.M., Pushparaj, P., Ahmed, F., Algahtani, H.A., Al-Qahtani, M.H., and Saleh Jamal, H. (2015). Molecular genetics of human primary microcephaly: an overview. *BMC Med. Genomics* **8** (Suppl 1), S4.

Frank, K.M., Sharpless, N.E., Gao, Y., Sekiguchi, J.M., Ferguson, D.O., Zhu, C., Manis, J.P., Horner, J., DePinho, R.A., and Alt, F.W. (2000). DNA ligase IV deficiency in mice leads to defective neurogenesis and embryonic lethality via the p53 pathway. *Mol. Cell* **5**, 993–1002.

Frappart, P.O., Tong, W.M., Demuth, I., Radovanovic, I., Herceg, Z., Aguzzi, A., Digweed, M., and Wang, Z.Q. (2005). An essential function for NBS1 in the prevention of ataxia and cerebellar defects. *Nat. Med.* **11**, 538–544.

Gai, M., Camera, P., Dema, A., Bianchi, F., Berto, G., Scarpa, E., Germena, G., and Di Cunto, F. (2011). Citron kinase controls abscission through RhoA and anillin. *Mol. Biol. Cell* **22**, 3768–3778.

Ganem, N.J., and Pellman, D. (2012). Linking abnormal mitosis to the acquisition of DNA damage. *J. Cell Biol.* **199**, 871–881.

Ganem, N.J., Cornils, H., Chiu, S.Y., O'Rourke, K.P., Arnaud, J., Yimlamai, D., Théry, M., Camargo, F.D., and Pellman, D. (2014). Cytokinesis failure triggers hippo tumor suppressor pathway activation. *Cell* **158**, 833–848.

Gao, Y., Ferguson, D.O., Xie, W., Manis, J.P., Sekiguchi, J., Frank, K.M., Chaudhuri, J., Horner, J., DePinho, R.A., and Alt, F.W. (2000). Interplay of p53 and DNA-repair protein XRCC4 in tumorigenesis, genomic stability and development. *Nature* **404**, 897–900.

Gunsalus, K.C., Bonaccorsi, S., Williams, E., Verni, F., Gatti, M., and Goldberg, M.L. (1995). Mutations in twinstar, a Drosophila gene encoding a cofilin/ADF homologue, result in defects in centrosome migration and cytokinesis. *J. Cell Biol.* **131**, 1243–1259.

Hall, J.R., Messenger, Z.J., Tam, H.W., Phillips, S.L., Recio, L., and Smart, R.C. (2015). Long noncoding RNA lincRNA-p21 is the major mediator of UVB-induced and p53-dependent apoptosis in keratinocytes. *Cell Death Dis.* **6**, e1700.

Harding, B.N., Moccia, A., Drunat, S., Soukarieh, O., Tubeuf, H., Chitty, L.S., Verloes, A., Gressens, P., El Ghouzzi, V., Joriot, S., et al. (2016). Mutations in citron kinase cause recessive microlissencephaly with multinucleated neurons. *Am. J. Hum. Genet.* **99**, 511–520.

Hayashi, M.T., and Karlseder, J. (2013). DNA damage associated with mitosis and cytokinesis failure. *Oncogene* **32**, 4593–4601.

- Huarte, M., Guttman, M., Feldser, D., Garber, M., Koziol, M.J., Kenzelmann-Broz, D., Khalil, A.M., Zuk, O., Amit, I., Rabani, M., et al. (2010). A large intergenic noncoding RNA induced by p53 mediates global gene repression in the p53 response. *Cell* 142, 409–419.
- Jacks, T., Remington, L., Williams, B.O., Schmitt, E.M., Halachmi, S., Bronson, R.T., and Weinberg, R.A. (1994). Tumor spectrum analysis in p53-mutant mice. *Curr Biol* 4, 1–7.
- Kaindl, A.M., Passemard, S., and Gressens, P. (2009). Autosomal recessive primary microcephalies (MCPH). *Eur. J. Paediatr. Neurol.* 13, 458.
- Karess, R.E., Chang, X.J., Edwards, K.A., Kulkarni, S., Aguilera, I., and Kiehart, D.P. (1991). The regulatory light chain of nonmuscle myosin is encoded by spaghetti-squash, a gene required for cytokinesis in *Drosophila*. *Cell* 65, 1177–1189.
- Kranenburg, O., van der Eb, A.J., and Zantera, A. (1996). Cyclin D1 is an essential mediator of apoptotic neuronal cell death. *EMBO J.* 15, 46–54.
- Kuffer, C., Kuznetsova, A.Y., and Storchová, Z. (2013). Abnormal mitosis triggers p53-dependent cell cycle arrest in human tetraploid cells. *Chromosoma* 122, 305–318.
- Li, H., Bielas, S.L., Zaki, M.S., Ismail, S., Farfara, D., Um, K., Rosti, R.O., Scott, E.C., Tu, S., Chi, N.C., et al. (2016). Biallelic mutations in citron kinase link mitotic cytokinesis to human primary microcephaly. *Am. J. Hum. Genet.* 99, 501–510.
- Madaule, P., Furuyashiki, T., Reid, T., Ishizaki, T., Watanabe, G., Morii, N., and Narumiya, S. (1995). A novel partner for the GTP-bound forms of rho and rac. *FEBS Lett.* 377, 243–248.
- Mahmood, S., Ahmad, W., and Hassan, M.J. (2011). Autosomal recessive primary microcephaly (MCPH): clinical manifestations, genetic heterogeneity and mutation continuum. *Orphanet J. Rare Dis.* 6, 39.
- Maliga, Z., Junqueira, M., Toyoda, Y., Ettinger, A., Mora-Bermúdez, F., Klemm, R.W., Vasilij, A., Guhr, E., Ibarlucea-Benitez, I., Poser, I., et al. (2013). A genomic toolkit to investigate kinesin and myosin motor function in cells. *Nat. Cell Biol.* 15, 325–334.
- Marzio, A., Merigliano, C., Gatti, M., and Verni, F. (2014). Sugar and chromosome stability: clastogenic effects of sugars in vitamin B6-deficient cells. *PLoS Genet.* 10, e1004199.
- McKenzie, C., and D'Avino, P.P. (2016). Investigating cytokinesis failure as a strategy in cancer therapy. *Oncotarget* 7, 87323–87341.
- Mengoli, V., Bucciarelli, E., Lattao, R., Piergentili, R., Gatti, M., and Bonaccorsi, S. (2014). The analysis of mutant alleles of different strength reveals multiple functions of topoisomerase 2 in regulation of *Drosophila* chromosome structure. *PLoS Genet.* 10, e1004739.
- Moriuchi, S., Shimizu, K., Miyao, Y., Kishima, H., Okawa, M., and Hayakawa, T. (1997). Decreased N-myc expression in human medulloblastoma cell lines during differentiation. *Anticancer Res.* 17 (1A), 301–306.
- Morris-Rosendahl, D.J., and Kaindl, A.M. (2015). What next-generation sequencing (NGS) technology has enabled us to learn about primary autosomal recessive microcephaly (MCPH). *Mol. Cell. Probes* 29, 271–281.
- Muzzi, P., Camera, P., Di Cunto, F., and Vercelli, A. (2009). Deletion of the citron kinase gene selectively affects the number and distribution of interneurons in barrelfield cortex. *J. Comp. Neurol.* 513, 249–264.
- Naim, V., Imarisio, S., Di Cunto, F., Gatti, M., and Bonaccorsi, S. (2004). *Drosophila* citron kinase is required for the final steps of cytokinesis. *Mol. Biol. Cell* 15, 5053–5063.
- Oda, E., Ohki, R., Murasawa, H., Nemoto, J., Shibue, T., Yamashita, T., Tokino, T., Taniguchi, T., and Tanaka, N. (2000). Noxa, a BH3-only member of the Bcl-2 family and candidate mediator of p53-induced apoptosis. *Science* 288, 1053–1058.
- Okamoto, K., and Prives, C. (1999). A role of cyclin G in the process of apoptosis. *Oncogene* 18, 4606–4615.
- Orth, J.D., Loewer, A., Lahav, G., and Mitchison, T.J. (2012). Prolonged mitotic arrest triggers partial activation of apoptosis, resulting in DNA damage and p53 induction. *Mol. Biol. Cell* 23, 567–576.
- Panier, S., and Boulton, S.J. (2014). Double-strand break repair: 53BP1 comes into focus. *Nat. Rev. Mol. Cell Biol.* 15, 7–18.
- Panopoulos, A., Pacios-Bras, C., Choi, J., Yenjerla, M., Sussman, M.A., Fotedar, R., and Margolis, R.L. (2014). Failure of cell cleavage induces senescence in tetraploid primary cells. *Mol. Biol. Cell* 25, 3105–3118.
- Pao, G.M., Zhu, Q., Perez-Garcia, C.G., Chou, S.J., Suh, H., Gage, F.H., O'Leary, D.D., and Verma, I.M. (2014). Role of BRCA1 in brain development. *Proc. Natl. Acad. Sci. USA* 111, E1240–E1248.
- Passemard, S., Kaindl, A.M., and Verloes, A. (2013). Microcephaly. *Handb. Clin. Neurol.* 111, 129–141.
- Pilaz, L.J., McMahon, J.J., Miller, E.E., Lennox, A.L., Suzuki, A., Salmon, E., and Silver, D.L. (2016). Prolonged mitosis of neural progenitors alters cell fate in the developing brain. *Neuron* 89, 83–99.
- Polo, S.E., and Jackson, S.P. (2011). Dynamics of DNA damage response proteins at DNA breaks: a focus on protein modifications. *Genes Dev.* 25, 409–433.
- Powell, E.M. (2013). Interneuron development and epilepsy: early genetic defects cause long-term consequences in seizures and susceptibility. *Epilepsy Curr.* 13, 172–176.
- Reinhardt, H.C., Aslanian, A.S., Lees, J.A., and Yaffe, M.B. (2007). p53-deficient cells rely on ATM- and ATR-mediated checkpoint signaling through the p38MAPK/MK2 pathway for survival after DNA damage. *Cancer Cell* 11, 175–189.
- Sarkisian, M.R., Li, W., Di Cunto, F., D'Mello, S.R., and LoTurco, J.J. (2002). Citron-kinase, a protein essential to cytokinesis in neuronal progenitors, is deleted in the flathead mutant rat. *J. Neurosci.* 22, RC217.
- Schuler, M., Maurer, U., Goldstein, J.C., Breitenbücher, F., Hoffarth, S., Waterhouse, N.J., and Green, D.R. (2003). p53 triggers apoptosis in oncogene-expressing fibroblasts by the induction of Noxa and mitochondrial Bax translocation. *Cell Death Differ.* 10, 451–460.
- Schultz, L.B., Chehab, N.H., Malikzay, A., and Halazonetis, T.D. (2000). p53 binding protein 1 (53BP1) is an early participant in the cellular response to DNA double-strand breaks. *J. Cell Biol.* 151, 1381–1390.
- See, W.L., Miller, J.P., Squatrito, M., Holland, E., Resh, M.D., and Koff, A. (2010). Defective DNA double-strand break repair underlies enhanced tumorigenesis and chromosomal instability in p27-deficient mice with growth factor-induced oligodendrogliomas. *Oncogene* 29, 1720–1731.
- Serres, M.P., Kossatz, U., Chi, Y., Roberts, J.M., Malek, N.P., and Besson, A. (2012). p27(Kip1) controls cytokinesis via the regulation of citron kinase activation. *J. Clin. Invest.* 122, 844–858.
- Sgrò, F., Bianchi, F.T., Falcone, M., Pallavicini, G., Gai, M., Chiotto, A.M., Berto, G.E., Turco, E., Chang, Y.J., Huttner, W.B., and Di Cunto, F. (2016). Tissue-specific control of midbody microtubule stability by Citron kinase through modulation of TUBB3 phosphorylation. *Cell Death Differ.* 23, 801–813.
- Shaheen, R., Hashem, A., Abdel-Salam, G.M., Al-Fadhli, F., Ewida, N., and Alkuraya, F.S. (2016). Mutations in CIT, encoding citron rho-interacting serine/threonine kinase, cause severe primary microcephaly in humans. *Hum. Genet.* 135, 1191–1197.
- Shieh, S.Y., Taya, Y., and Prives, C. (1999). DNA damage-inducible phosphorylation of p53 at N-terminal sites including a novel site, Ser20, requires tetramerization. *EMBO J.* 18, 1815–1823.
- Turinetto, V., and Giachino, C. (2015). Multiple facets of histone variant H2AX: a DNA double-strand-break marker with several biological functions. *Nucleic Acids Res.* 43, 2489–2498.
- Woods, C.G., and Parker, A. (2013). Investigating microcephaly. *Arch. Dis. Child.* 98, 707–713.
- Wu, G., Zhou, L., Khidr, L., Guo, X.E., Kim, W., Lee, Y.M., Krasieva, T., and Chen, P.L. (2008). A novel role of the chromokinesin Kif4A in DNA damage response. *Cell Cycle* 7, 2013–2020.
- Zhang, C.Z., Leibowitz, M.L., and Pellman, D. (2013). Chromothripsis and beyond: rapid genome evolution from complex chromosomal rearrangements. *Genes Dev.* 27, 2513–2530.

## Supplemental Information

### **Citron Kinase Deficiency Leads to Chromosomal Instability and TP53-Sensitive Microcephaly**

**Federico Tommaso Bianchi, Chiara Tocco, Gianmarco Pallavicini, Yifan Liu, Fiammetta Verni, Chiara Merigliano, Silvia Bonaccorsi, Nadia El-Assawy, Lorenzo Priano, Marta Gai, Gaia Elena Berto, Alessandra Maria Adelaide Chiotto, Francesco Sgrò, Alessia Caramello, Laura Tasca, Ugo Ala, Francesco Neri, Salvatore Oliviero, Alessandro Mauro, Stephan Geley, Maurizio Gatti, and Ferdinando Di Cunto**

## Supplemental data items

Figure S1.

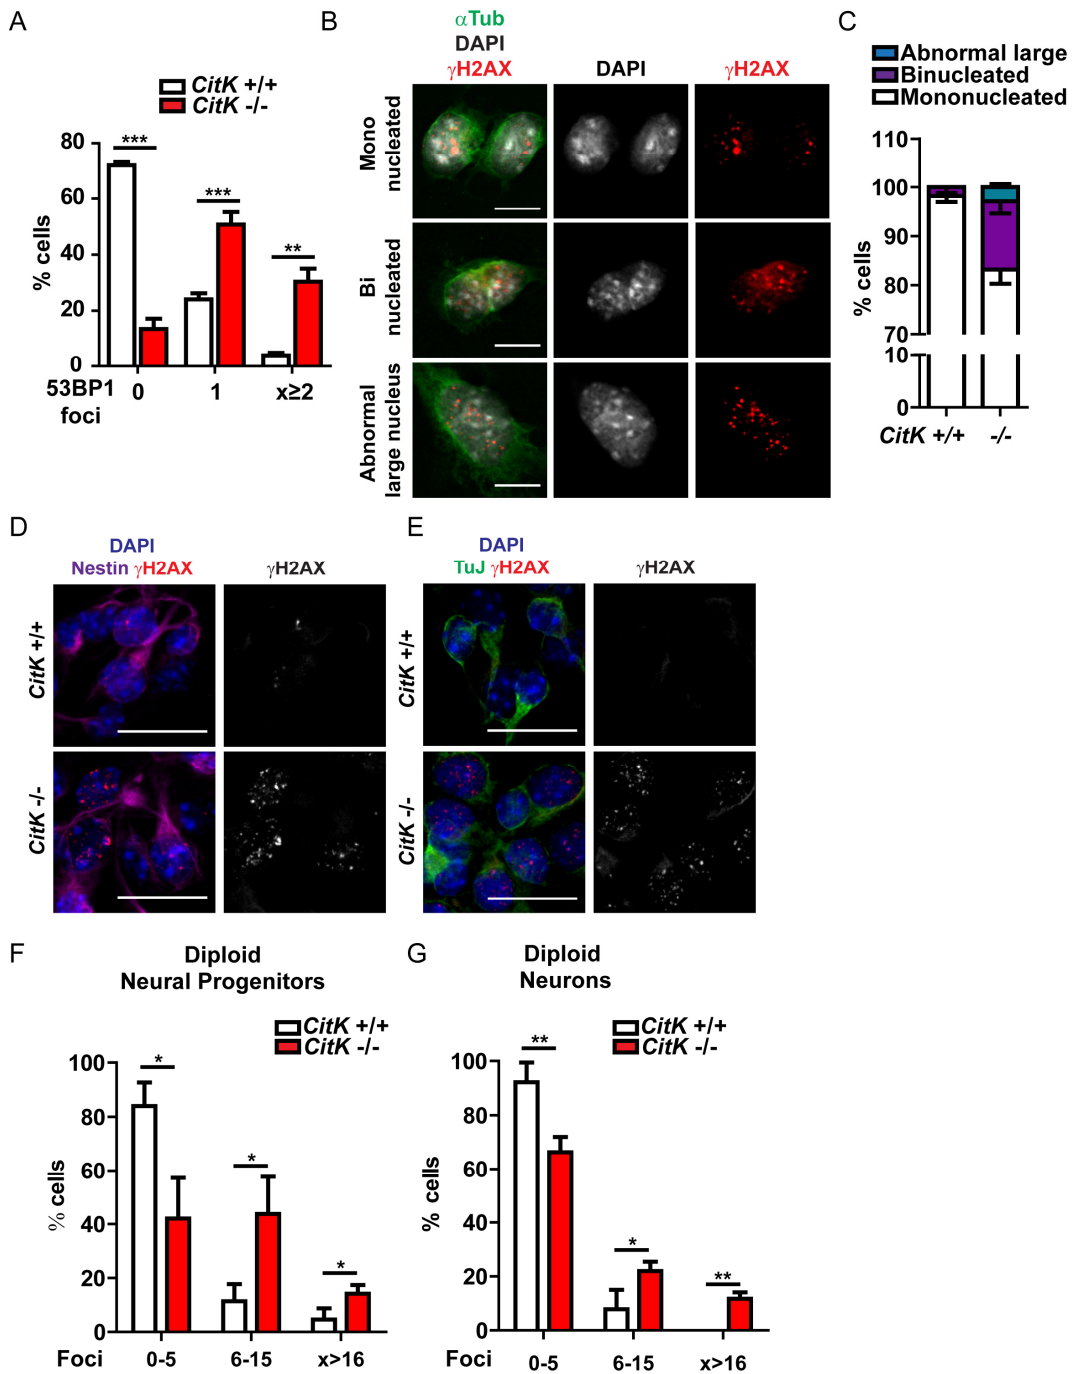

**Figure S1. Additional data on DNA damage in *CitK*<sup>-/-</sup> NPC. Related to Figure 1.**

**A**) Frequencies of cells negative (0 foci/cell), moderately positive (1 focus/cell) or strongly positive (>2 foci/cell) for 53BP1, in developing mouse cortex. **B**) Examples of mononucleated cells, binucleated cells and cells with an abnormally large nucleus from *CitK*<sup>-/-</sup> NPC cultures stained with alpha tubulin (Tub, green), gH2AX (red) and DAPI (gray). **C**) Relative frequency of the three types of cell populations described in B observed in control *CitK*<sup>+/+</sup> and *CitK*<sup>-/-</sup> mice. **D-E**) NPCs from E12.5 embryo cortices stained for γH2AX (red), DNA (DAPI, blue) and either Nestin (magenta) or TUJ (green). Scale bars, 10 μm. **F-G**) Frequency of cells negative (0-5 foci/cell), moderately positive (6-15 foci/cell) or strongly positive (>15 foci/cell) for γH2AX in diploid NPCs positive for Nestin (Neural progenitors) or TUJ (post mitotic neurons). Two tails unpaired Student's t test were used for the statistical analysis of these experiments (n = 3-4 mice per group). Graphs show mean ± s.e.m. \* p < 0.05; \*\* p < 0.01; \*\*\* p < 0.001.



Figure S2.

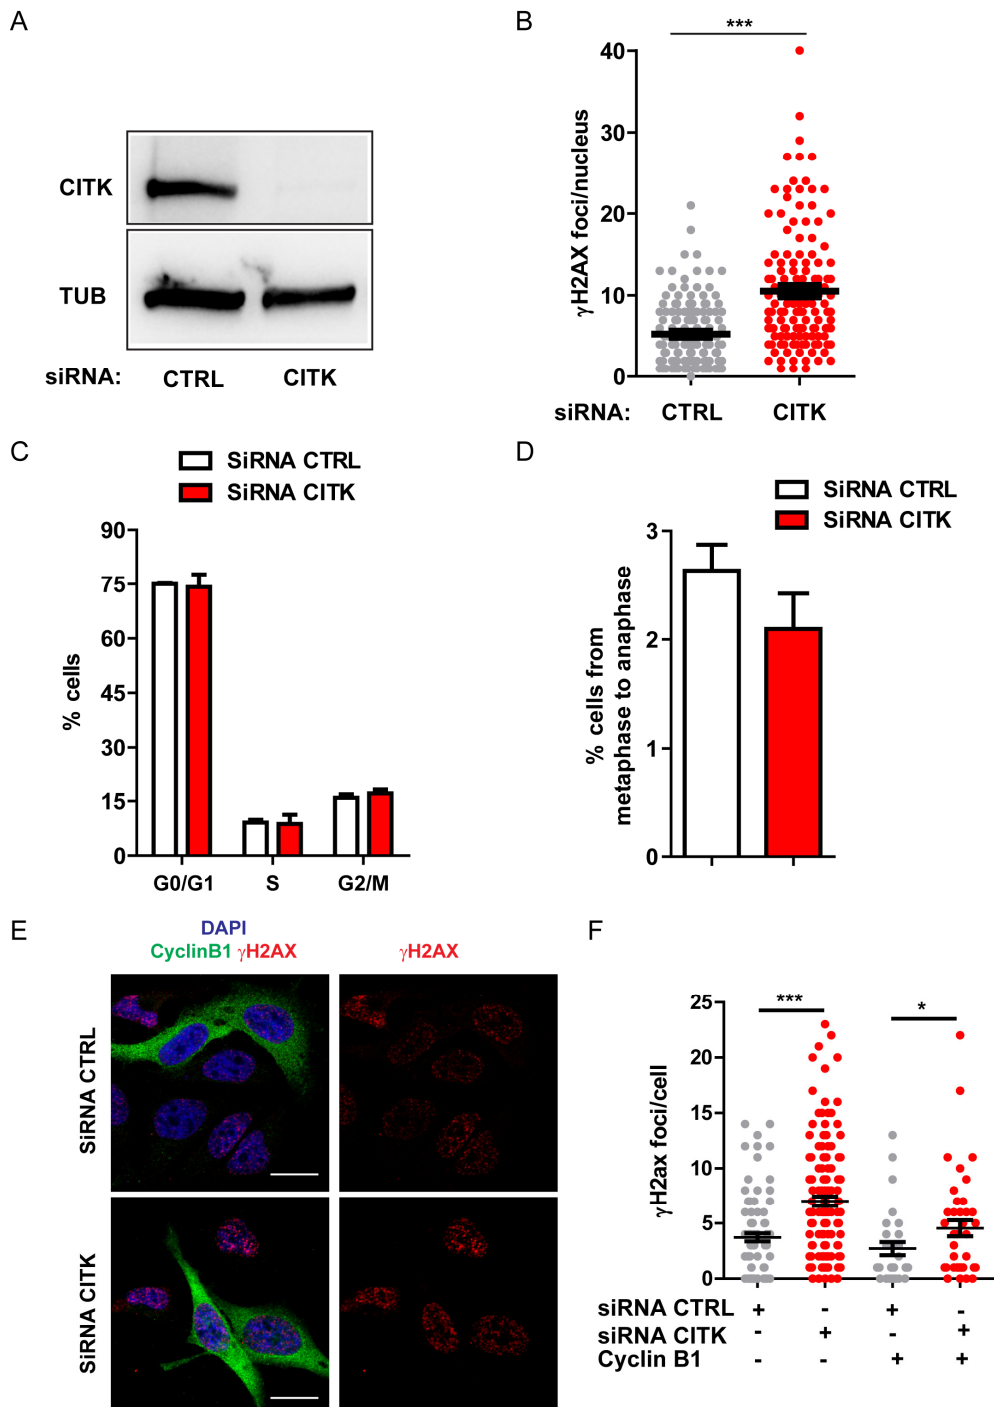

**Figure S2. CITK leads to DSB accumulation or IR sensitivity independently of the cell cycle stage. Related to Figure 2 and Figure 3.**

**A)** Western blot of lysates from ONS-76 cells, 48h after transfection with mock or CITK-specific siRNA. **B)** Quantification of  $\gamma$ H2AX foci per cell in ONS-76 cells, 48h after transfection with the indicated siRNA. **C)** Flow cytometric analysis of cell cycle of HeLa cells 48 h after transfection with the indicated siRNA. **D)** Prometaphases, metaphases and anaphases were quantified by IF based on DAPI morphology in cultures obtained as in panel C. **E)** HeLa cells incubated 48 hour with the indicated siRNA and stained for  $\gamma$ H2AX (red), cyclin B1 (green) and DNA (DAPI, blue) 1 hour after irradiation (4 Gy). Scale bars, 10  $\mu$ m. **F)** Quantification of  $\gamma$ H2AX foci in cells positive or negative for anti-Cyclin B1 staining obtained as in panel E. Two tails unpaired Student's t test was used for the statistical analysis of these experiments (n = 3 per group). Graphs show mean  $\pm$  s.e.m. \* p < 0.05; \*\* p < 0.01; \*\*\* p < 0.001.

Figure S3

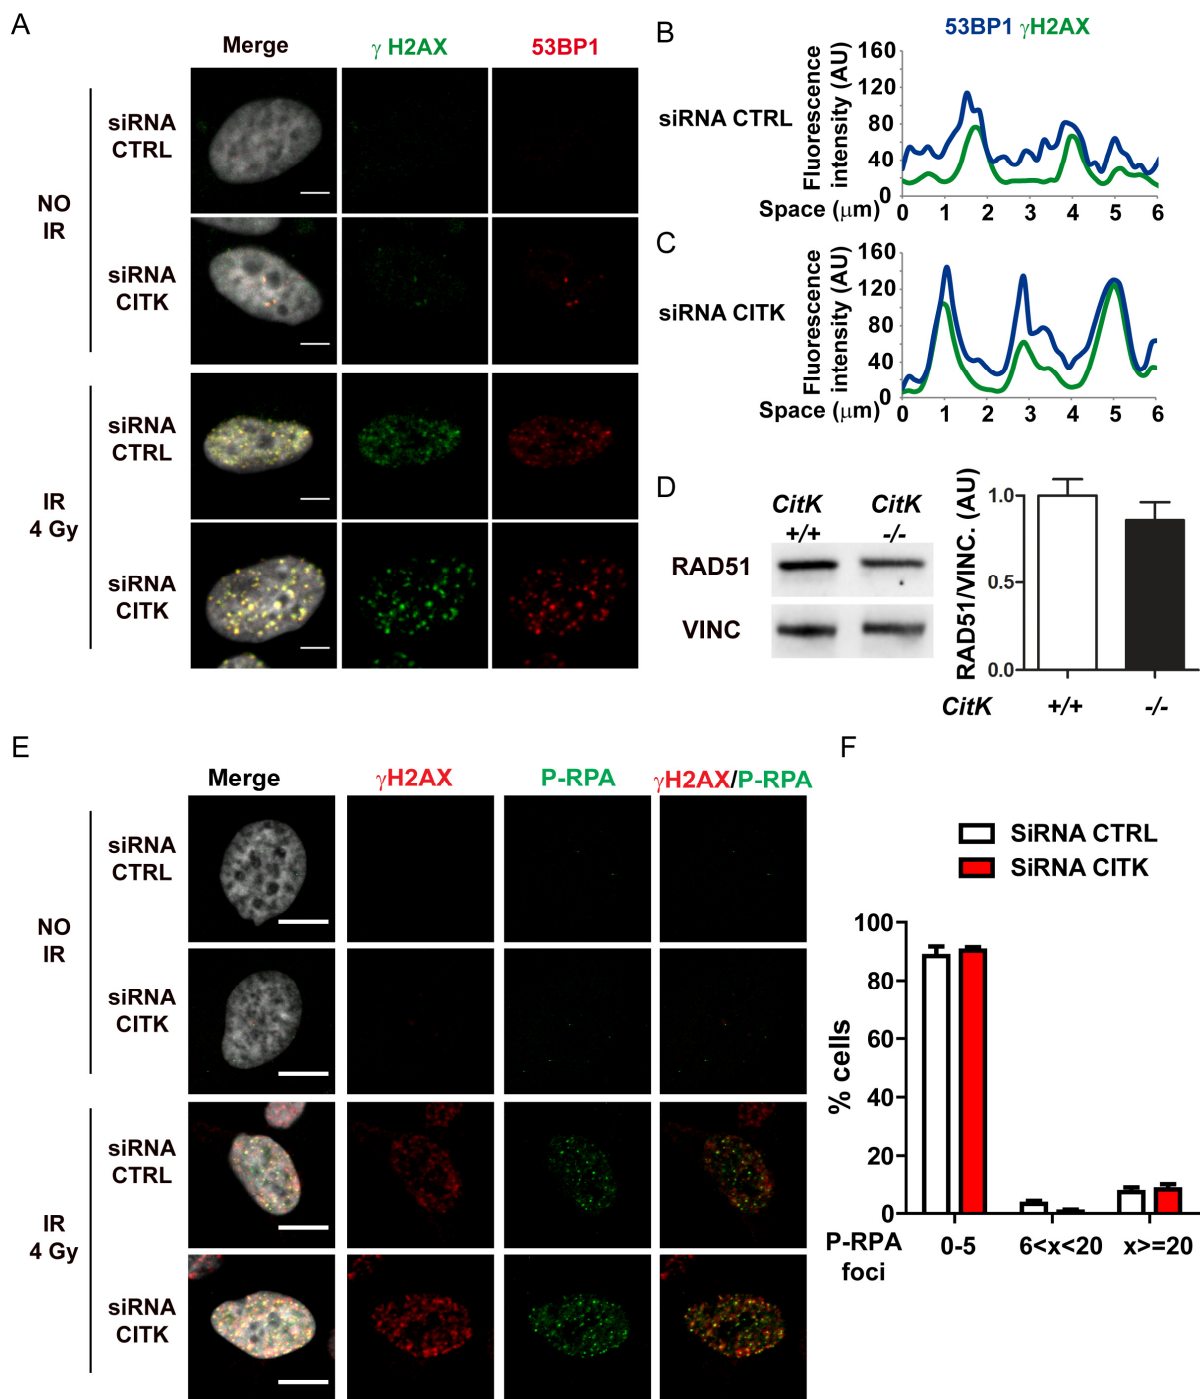

Figure S3. Localization of 53BP1 and P-RPA to  $\gamma$ H2AX foci. Related to Figure 4.

A) HeLa cells incubated 48 hours with the indicated siRNA and stained for  $\gamma$ H2AX (green), 53BP1 (red) and DNA (DAPI, gray) before (NO IR) or four hours after irradiation (IR 4 Gy). Scale bars, 5  $\mu$ m. B-C) Representative profiles of co-localization between  $\gamma$ H2AX and 53BP1 signals in the above experiment. Fluorescence intensity was plotted for the two channels along a 6  $\mu$ m-long line, randomly drawn in nuclei of exemplar cells. D) Total levels of RAD51 were analyzed by western blotting on P4 developing cerebella whole lysates. The histogram on the right shows quantification of the ratio between levels of RAD51 and Vinculin (VINC), which was used as internal loading control. E) HeLa cells incubated 48 hours with the indicated siRNA and stained for  $\gamma$ H2AX (red), P-RPA (green) and DNA (DAPI, gray) before (NO IR) or 1 hour after irradiation (IR 4 Gy). Scale bars, 10  $\mu$ m. F) Frequency of cells negative (0-5 foci/cell), moderately positive (6-19 foci/cell) or strongly positive ( $\geq$ 20 foci/cell) for P-RPA foci in cells obtained as in E. Two tails unpaired Student's t test was used for the statistical analysis of these experiments (n = 3 per group). Graphs show mean  $\pm$  s.e.m.

**Figure S4**

**A**

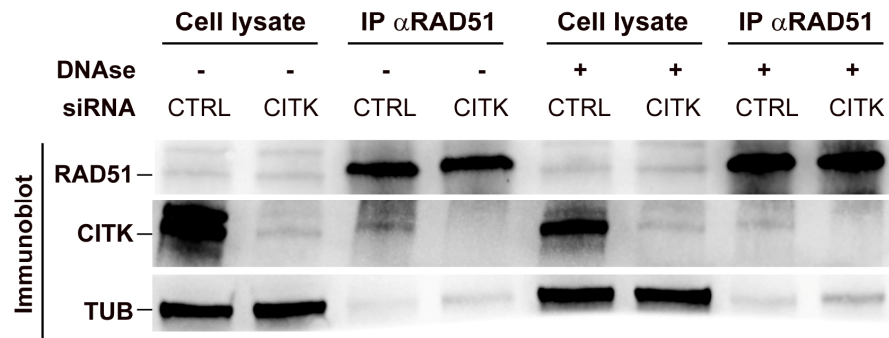

**B**

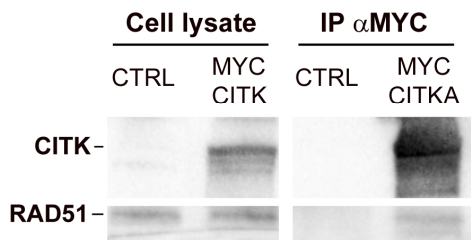

**C**

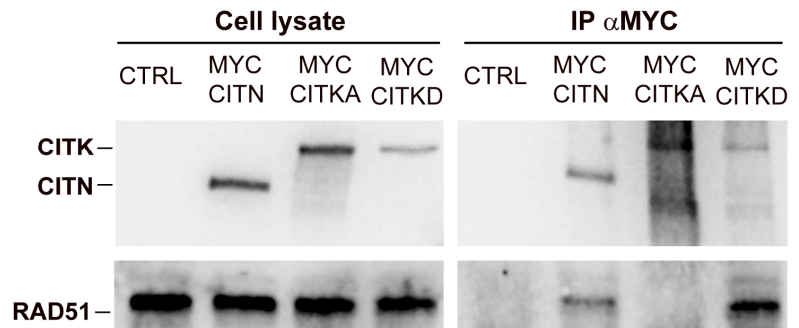

**Figure S4. The association between CITK and RAD51 is DNA-independent and may be influenced by CITK catalytic activity. Related to Figure 4.**

**A)** Western blot of total cell lysates or anti-RAD51 immunoprecipitations obtained from ONS-76 medulloblastoma cells treated with control or CITK-specific siRNAs, in presence or absence of DNase. Endogenous CITK, RAD51 and beta-tubulin (TUB) were revealed. **B)** Active MYC-tagged CITK (CTKA) or empty control vector were transfected in 293T cells. Total cell lysates were prepared from these cells 48 hours after transfection and then subjected to immunoprecipitation using anti-MYC antibodies. Lysates and immunoprecipitates were then analyzed by WB with anti CITK and RAD51 antibodies. **C)** The same experiment shown in panel B was performed on cells transfected with MYC-tagged CTKA, kinase dead mutant (CITKD) and CITN isoforms. Data are representative of 3 independent experiments.

**Figure S5**

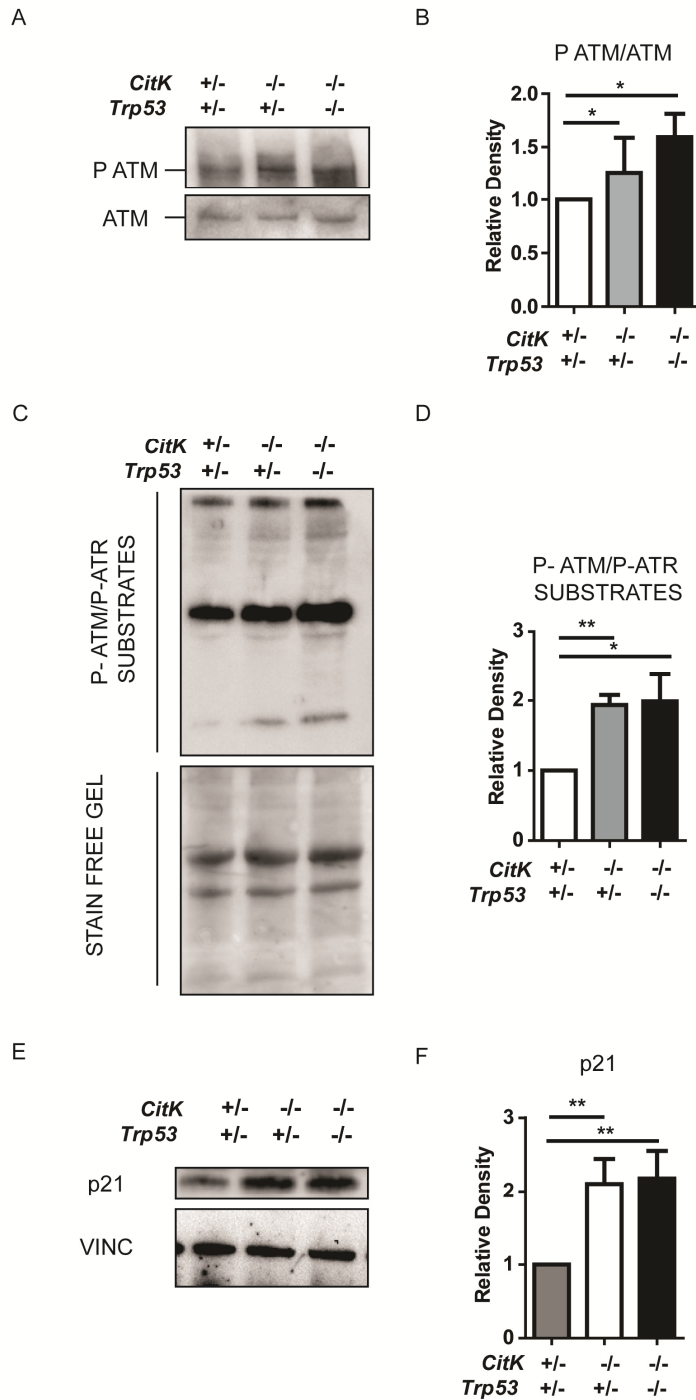

**Figure S5. Activation of ATM and p21 in *CitK* knockout mice is independent of their p53 status. Related to Figure 5.**

Western blots of total cell extracts from P4 cerebella of mice of the indicated genotypes, probed with antibodies against ATM and phosphorylated ATM (P ATM) (A), the ATM/ATR phospho-substrates (C), p21 and loading control Vinculin (E). **B**) The ratios between the phosphorylated (P ATM) and total ATM were quantified. **D**) The anti ATM/ATR phospho-substrate antibody (ATM/ATR P-substrates) recognizes proteins containing sites phosphorylated by either of these kinases. We measured the global signal of these lanes (including all antibody-positive bands). The quantification measures the ratio between global signal and total amount of proteins in the lane (obtained using the BioRad fluorescence detection of proteins). **F**) The ratios between p21 and Vinculin were quantified. Two tails unpaired Student's t test were used for the statistical analysis of these experiments ( $n = 3-4$  mice per group). Graphs show mean  $\pm$  s.e.m. \*  $p < 0.05$ ; \*\*  $p < 0.01$ .

**Figure S6.**

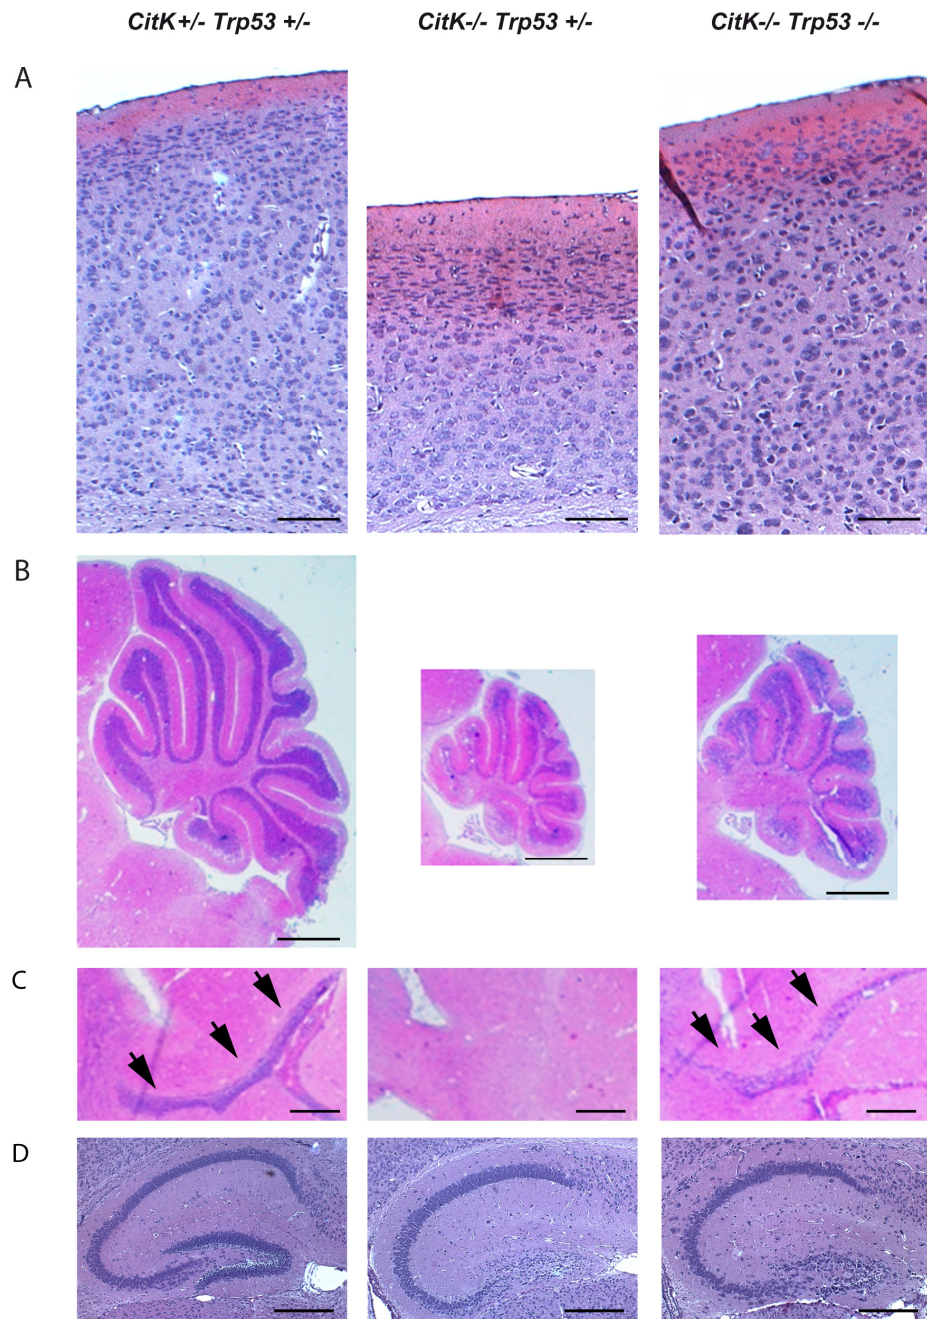

**Figure S6. The inactivation of Trp53 in *CitK*<sup>-/-</sup> mice leads to partial rescue of the histological brain phenotype. Related to Figure 6.**

**A-E** Low magnification micrographs of cortices (A), cerebella (B), subventricular migratory stream (C, indicated by arrows) and hippocampal formation (D), obtained from brain sections of P21-old mice of the indicated genotypes, stained with hematoxylin/eosin (H&E). Scale bars correspond to 150  $\mu$ m in A and 500  $\mu$ m in the other panels.

**Figure S7.**

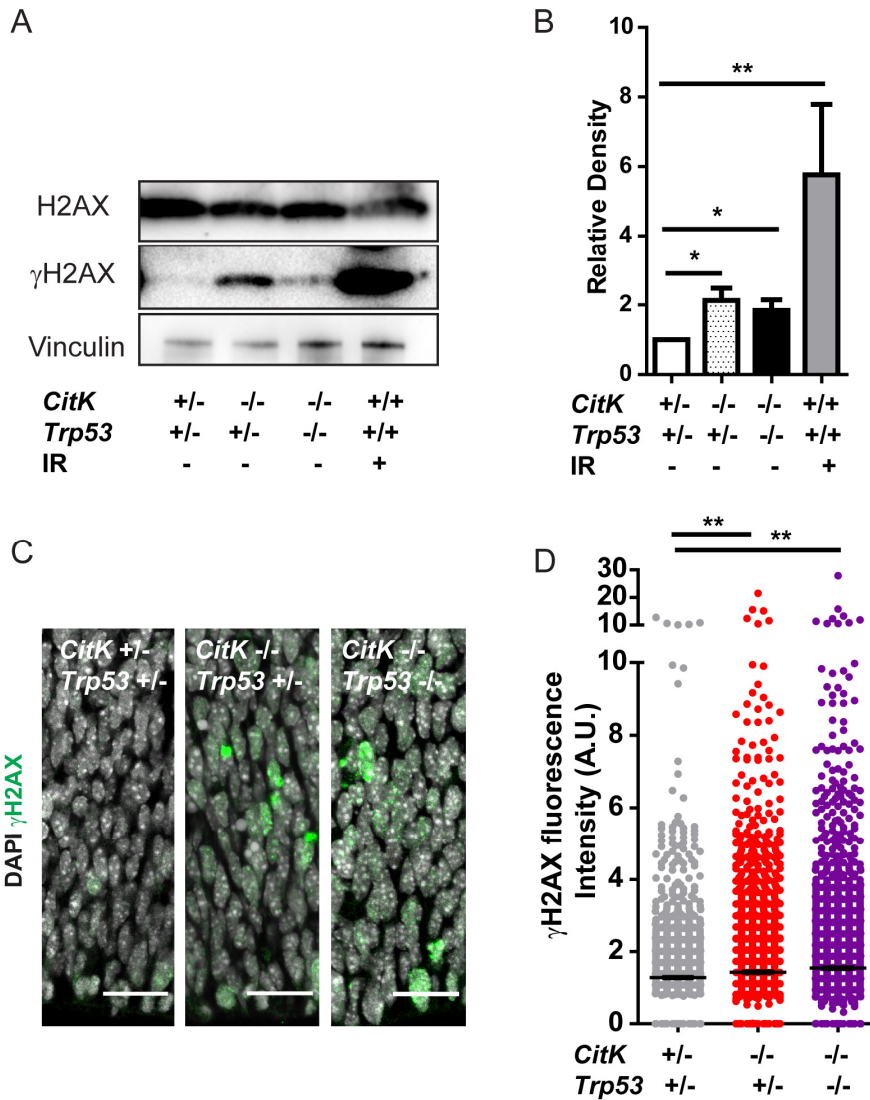

**Figure S7. DNA damage in *CitK* mutant mice is p53-independent. Related to Figure 6.**

**A, B)** Extended version of Figure 1C, showing western blots of lysates obtained from P4 cerebella of the indicated genotypes, incubated with anti- $\gamma$ H2AX, anti-H2AX and anti-Vinculin antibodies. Cerebella obtained from IR-treated WT mice were used as a positive control. Quantification of the experiments is shown in B. **C-D)** Cerebral cortex sections from E14.5 mouse embryos of different genotypes were immunostained (C) for  $\gamma$ H2AX (green) and DAPI (gray). Fluorescence intensities were quantified in (D). Scale bars = 50  $\mu$ m. Two tails unpaired Student's t test was used for the statistical analysis of these experiments (n = 3–5 mice per group). Graphs show mean  $\pm$  s.e.m. \* p < 0.05; \*\* p < 0.01.

**Movie S1. Spontaneous locomotor activity of P30 CitK +/- and Trp53 +/- mouse. Related to Figure 7.**

**Movie S2. Spontaneous locomotor activity of P30 CitK -/- and Trp53 +/- mouse. Related to Figure 7.**

**Movie S3. Spontaneous locomotor activity of P30 CitK -/- and Trp53 -/- mouse. Related to Figure 7.**

**Data S1. Differentially expressed genes, in pairwise comparisons of RNA-sequencing data obtained from P4 mouse cerebella of all the indicated genotypes. Related to Figure 6 and to Supplemental Table 1**

## Supplemental experimental procedures

### Immunoprecipitations and western blotting.

For all immunoprecipitations, cells and tissue were extracted with lysis buffer containing 150 mM NaCl, 1 mM MgCl<sub>2</sub>, 50 mM Tris pH 7, 1% NP40, 5% Glycerol protease inhibitors (Roche, Basel; Switzerland) and 1mM phenylmethylsulfonyl fluoride (PMSF). Antibodies and Dynabeads protein G (GE Healthcare Life Science, Little Chalfont, UK) were added to cleared lysates and incubated for 2 hours at 4°C. Pellets were washed four times with lysis buffer and analyzed by SDS-PAGE. When specified we added RQ1 DNase at the concentration of 10U/ml (Promega, Madison, WI, USA). For immunoblots, immunoprecipitates or equal amounts of proteins from total cell lysates were resolved by reducing SDS-PAGE and transferred to nitrocellulose or PVDF filters that were then incubated with the indicated antibodies (see Supplemental Table S5) and developed using the the Luminata Forte HRP (Merck Millipore, Billerica, MA, USA).

### Staining of mouse embryonic cortex and adult mouse brain.

Embryonic brains were dissected at E14.5 and fixed for 12-16 hours (h) at 4°C in. Postnatal mice were trans-cardially perfused with 4% PFA. Brains were post-fixed overnight at 4°C equilibrated in 30% sucrose in PBS for 12-24h at 4°C, embedded with Tissue-TEK (O.C.T, Sakura Finetek, Alphen aan den Rijn, The Netherlands), frozen in liquid nitrogen and stored at -20°C. Sectioning was then performed with a cryostat (20µm). For staining, cryo-sections were subjected to antigen retrieval using 10mM Na Citrate pH 6.5, 1% Glycerol in PBS. Sections were then permeabilized with 0.3% Triton X-100 in PBS for 30 minutes (min) and quenched with 0.1 M glycine for 30 min. Sections were then incubated with primary antibodies overnight at 4°C, and then with secondary antibodies for 1 h at room temperature (RT) in a solution of 0.2% gelatin, 300 mM NaCl, and 0.3% Triton X-100 in PBS. DNA was stained in the last wash using 4',6-diamidino-2-phenylindole (DAPI) 30 min at RT and sections were mounted using ProLong anti-fade reagent (Thermo Fisher Scientific, Waltham, MA, USA). Fluorescent Nissl staining was performed using the NeuroTrace™ Fluorescent Nissl Stains (Thermo Fisher Scientific, Waltham, MA, USA) according to manufacturer's protocol. Apoptosis was measured by the TUNEL assay using "In Situ cell death detection kit, TMD red" (Roche, Basel; Switzerland) according to manufacturer's protocol. Following TUNEL staining, sections were counterstained with DAPI and mounted using ProLong anti-fade reagent (Thermo Fisher Scientific, Waltham, MA, USA).

### Cell culture.

HeLa and ONS-76 cells were cultured in RPMI medium supplemented with 10% fetal bovine serum (FBS) and 1% penicillin/streptomycin. 293T cells were cultured in DMEM medium supplemented with 10% fetal bovine serum (FBS) and 1% penicillin/streptomycin cells. Embryonic brains were isolated from E12 timed pregnant mice. The lateral portion of the dorsal telencephalon was dissected, dissociated using a Papain based kit (Neural Tissue Dissociation Kit (P), Miltenyi Biotec, Bergisch Gladbach, Germany) and plated at the concentration of  $5 \times 10^4$  cells/cm<sup>2</sup> on Poly-L-lysine/ Laminin-treated glass coverslip. Cells were analyzed 18h after plating. Culture medium comprised DMEM F12, supplemented with 2% B27 w/o Retinoic Acid, 10ng/ml EGF and 40 ng/ml bFGF (all from Thermo Fisher Scientific, Waltham, MA). Cells were grown at 37° C in a humidified incubator with 5% CO<sub>2</sub>.

### Plasmids, recombinant proteins, siRNAs and cell transfection.

The CITK -Cherry wild-type, MYC-CITK wild-type, MYC-CITN wild-type and MYC-CITKD constructs have been previously described (Gai et al., 2011). 293T cells were transfected with Trans-IT-LT1 transfection reagent (Mirus Bio, Madison, WI, USA Bio) according to manufacturers' instruction.

In this study, we used a previously validated siRNA sequence (CK1 =AUGGAAGGCACUAUUUCUCA) (Gai et al., 2011). siRNAs were obtained from GE-Healthcare (Dharmacon, Lafayette, CO, USA). The ON-TARGET-plus non-targeting siRNA #1 was used as a negative control for potential off-target effects. HeLa or ONS-76 cells plated on a six-well plate were transfected using 1 µg of the required plasmid DNA and either 3 µl of Trans-IT-LT1 transfection reagent (Mirus Bio, Madison, WI, USA Bio), or 6.25 µl of the required siRNA (20 µM) and 2.5 µl Lipofectamine 2000 (Thermo Fisher Scientific, Waltham, MA), according to manufacturers' specifications. For HeLa cells efficient knockdown was obtained after 48 h (Gai et al., 2011).

### Antibodies.

We used the following antibodies: 53BP1 (Abcam), ATM (Cell Signaling Technologies, Danvers, MA), ATM / ATR substrate (Cell Signaling Technologies), Phospho ATM (Cell Signaling Technologies), ATR (Cell Signaling Technologies), Phospho ATR (Cell Signaling Technologies), Calbindin (Swant, Marlyn, Switzerland), Calretinin (Swant), Citron (Mouse, BD – Transduction laboratories), Citron (Rabbit, Abcam), Cyclin B1 (Santa Cruz Biotechnology), H2AX (Cell Signaling Technologies), PH3 (Rat, Abcam), HSP90 (Santa Cruz Biotechnology, Dallas, TE), Myc (Home-made from clone 9E10), Nestin (Abcam), p21 (Santa Cruz Biotechnology), p53 (Mouse clone 1C12, Cell Signaling Technologies), Phospho p53 (ser15, Cell Signaling Technologies), RAD51 (GeneTex), RPA32/RPA2 (Phospho S4+S8, Abcam), TUJ (Covance, Princeton, NJ), TUJ 488 Alexa labeled (Covance), Vinculin (Home-made),



$\alpha$ Tubulin (Sigma-Aldrich),  $\gamma$ H2AX (Rabbit S139, Cell Signaling Technologies),  $\gamma$ H2AX (Rabbit 20E3, S139, Cell Signaling Technologies),  $\gamma$ H2AX (Mouse clone 9F3).

#### ***In vivo and in vitro* X-ray treatment.**

X-ray treatment was performed using a RADGILL irradiator Stationary anode X-ray tube, 200kV (Gilardoni, Mandello del Lario Lecco, Italy). Newborn mice were irradiated with 12 Gy, and sacrificed after 30' or 5 h; cerebella were extracted and processed for Western blotting. HeLa cells were irradiated at indicated doses and then processed for immunofluorescence at different post irradiation times.

#### **Clonogenic assay.**

24 h after transfection of CITK-specific and control siRNA, HeLa cells were irradiated at the indicated doses and seeded in six-well plates 30 min later, at the concentration of 500 cells per well. Cells were cultured for 10 to 14 days to allow for colony formation. Colonies were washed twice in PBS, stained for 15 min with Nissl staining (0.1% Cresyl Violet Acetate, 0.6% glacial acetic acid) and rinsed in water. The surviving fraction was determined by counting colonies of more than 50 cells.

#### **Metaphase Spread Analysis.**

Two days after transfection with appropriate siRNA, ONS-76 cells were treated with KaryoMAX Colcemid Solution (0.1  $\mu$ g/ml, GIBCO), for 90 min. Cells were hypotonically swollen with 0.075 M KCL (15 min, 37° C), fixed with cold methanol/acetic acid (3:1) for 10 minutes at RT, dropped onto microscope slide and flame burned for two second. The slides were dried at 60°C for 1h and then stained with DAPI and mounted with Prolong (Thermo Fisher Scientific, Waltham, MA), Metaphases were imaged using a HCX PL APO 63x/1.4 NA OIL immersion objective on a Microscope Nikon ViCo. Our karyotypic analyses revealed that most metaphases of control and CITK-depleted cells contain between 74 to 80 chromosomes.

#### **Cell staining.**

For RAD51,  $\gamma$ H2AX and 53BP1 immunostaining cells were fixed 5 min at RT using PFA 2% then treated 10 min at RT using CSK buffer [100 mM NaCl, 300 mM sucrose, 3 mM MgCl<sub>2</sub>, 10 mM PIPES (pH 6.8)] 0.7% Triton, and finally fixed again 5 min at RT using PFA 2%. Cells were then permeabilized in 0,1% Triton X 100 in PBS for 10 min, saturated in 5% BSA in PBS for 30 min and incubated with the desired primary antibody (see Table1 ) for 1h at RT. Primary antibodies were detected with anti-rabbit Alexa Fluor 488 or 568 (Molecular Probes, Thermo Fisher Scientific, Waltham, MA), anti-mouse Alexa Fluor 488 or 568 (Molecular Probes, Thermo Fisher Scientific, Waltham, MA) used at 1:500 dilution for 30 min Cells were counterstained with 0.5  $\mu$ g/ml DAPI for 10 min and washed with PBS.

#### ***Drosophila* strains.**

The *dck*<sup>1</sup> and *dck*<sup>2</sup> mutant alleles, were described in (Gatti and Baker, 1989; Naim et al., 2004). Both alleles were kept in stocks over the balancer chromosome TM6 C carrying the dominant markers *Stubble* (*St*) and *Tubby* (*Tb*). The *tsr*<sup>1</sup> (Gunsalus et al., 1995) and *sqh*<sup>1</sup> (Karess et al., 1991) mutant alleles were kept balanced over the *FM7-TbA*, (carrying the dominant markers *Bar* and *Tb*; (Lattao et al., 2011)) and *TSTL* (carrying the dominant markers *Curly* (*Cy*) and *Tb*) chromosomes, respectively (for details, see <http://flybase.bio.indiana.edu/>). Homozygous mutant larvae were always recognized for their non-*Tubby* phenotype. All stocks were maintained on standard *Drosophila* medium at 25°C.

#### ***Drosophila* chromosome cytology and $\gamma$ H2Av immunostaining.**

To analyze metaphase chromosomes, brains from third instar larvae were dissected in saline (NaCl 0.7) and incubated for 1h with colchicine (10<sup>-5</sup> M in saline). Brains were treated for 8 min with hypotonic solution (0.5% Na Citrate), squashed in 45% acetic acid under a 20 x 20 mm coverslip and then frozen in liquid nitrogen. After removal of the coverslip, preparations were mounted in Vectashield H-1200 (Vector Laboratories), containing the DNA dye DAPI. To test X-ray sensitivity, wild type and homozygous *dck* mutant larvae were irradiated with 2.5 Gy and analyzed as above 3 h after irradiation. For immunostaining, brains from third instar larvae were dissected and fixed as previously described in (Bonaccorsi et al., 2000). Brain preparations were then rinsed in PBS containing 0.1% Triton-X (PBST), incubated overnight at 4°C with rabbit anti-Histone H2AvD pS137 (1:100 in PBST; Rockland code #600-401-914), rinsed in the same buffer and then incubated for 1h at RT with Alexa-Fluor-555-conjugated anti-rabbit secondary antibody (1:300 in PBST; Molecular Probes). After two rinses in PBST preparations were mounted in DAPI-containing Vectashield H-1200 (Vector Laboratories). To quantify the  $\gamma$ H2Av-positive foci at least 800 cells were analyzed from at least 3 brains. All cytological preparations were examined with a Zeiss Axioplan fluorescence microscope, equipped with an HBO100W mercury lamp and a cooled charged-coupled device (CCD camera; Photometrics CoolSnap HQ). Images were converted to Photoshop (Adobe System), pseudo-colored and merged.

#### **RNA-sequencing and bioinformatic analysis.**

RNA-seq was performed as previously described (Neri et al., 2015) with some modifications; RNA quality was checked using the Bioanalyzer instrument. Libraries were prepared from total RNA using TruSeq RNA Sample Preparation v2

according to the Illumina's protocol and sequenced on Illumina HiScanSQ platform. Sequencing reads were trimmed out of the low-quality bases with Fastx Toolkit. Filtered sequences were mapped on mm9 genome assembly by using TopHat v2.0.6 (Trapnell et al., 2009) and mRNAs quantification were performed using Cuffdiff v2.0.2 (Kim et al., 2013). For downstream analysis, genes with RPKM < 1 in all the samples were filtered out. Primary data have been deposited in the Gene Expression Omnibus database with accession number GSE83465. Gene Ontology was analysed using DAVID web software (Huang et al., 2009).

### **Mice behavior testing.**

An activity cage (Ugo Basile Biological Research Apparatus, Varese, Italy) was used to track the movement in horizontal or vertical direction using an infrared sensor. After a two h acclimation period, animals were individually tracked for 24 h.

### **Mice EEG.**

We recorded quantitative Electro-Encephalogram (qEEG) at three different ages: 12 days, 4 weeks and 12 weeks. For each recording, a 3 min period of artefact-free background EEG was selected. Subsequent power spectral analyses were performed by means of LabChart™ 6.2 software (ADInstruments™). Each period was subjected to Fast Fourier Transform (FFT), epochs of 4s, tapered with Hanning window; the frequencies spectrum of the EEGs used for the FFT ranged from 0,5 to 20Hz. Absolute power values were normalized to the total absolute power to obtain relative values, comparable among the different recordings. Mean dominant frequency (MDF), defined as the “center of mass” of a frequency band, was extracted from power spectra within delta (0.5-4 Hz), theta (4-8 Hz), alpha (8-12 Hz) and beta (12-20 Hz) bands using the formula:

$$\text{MDF} = \sum (P_i \cdot f_i) / \sum P_i$$

where  $P_i$  is the power at frequency  $f_i$  and  $i$  is the index sweeping the whole frequency band samples.

### **Microscopy and image analysis in mouse and human cells**

Imaging was performed using a Leica TCS SP5-AOBS 5-channel confocal system (Leica Microsystems GmbH, Germany) equipped with a 405nm diode, an argon ion, a561nm DPSS and a HeNe laser. Fixed cells were imaged using a PL APO 40x/1.2 NA oil immersion objective. All the images were analyzed by using Fiji Software. Foci were quantified using the command "Find Maxima" after the appropriate setting of the threshold and noise. Colocalization analysis was performed using the Fiji's plugin "Coloc 2", and calculating the Mander's Overlap Coefficient (MOC) of the RAD51 signal over  $\gamma$ H2AX signal. MOC, similarly to Pearson Correlation Coefficient is used to quantify the degree of colocalization between fluorophores. MOC value varies between 0 and 99, with 0 corresponding to mutually exclusive signals and 99 to complete overlap. For ploidy measurements, nuclei were manually identified as regions of interest (ROI) in maximum projections of confocal stacks and “integrated density” was measured for each ROI. Diploid and tetraploid nuclear fluorescence intensities were defined by analyzing the distribution in control cultures.

### **Supplemental references**

Bonaccorsi, S., Giansanti, M. G., and Gatti, M. (2000). Spindle assembly in *Drosophila* neuroblasts and ganglion mother cells. *Nat Cell Biol* 2, 54-56.

Gatti, M., and Baker, B. S. (1989). Genes controlling essential cell-cycle functions in *Drosophila melanogaster*. *Genes Dev* 3, 438-453.

Kim, D., Pertea, G., Trapnell, C., Pimentel, H., Kelley, R., and Salzberg, S. L. (2013). TopHat2: accurate alignment of transcriptomes in the presence of insertions, deletions and gene fusions. *Genome Biol* 14, R36.

Lattao, R., Bonaccorsi, S., Guan, X., Wasserman, S. A., and Gatti, M. (2011). Tubby-tagged balancers for the *Drosophila* X and second chromosomes. *Fly (Austin)* 5, 369-370.

Neri, F., Incarnato, D., Krepelova, A., Dettori, D., Rapelli, S., Maldotti, M., Parlato, C., Anselmi, F., Galvagni, F., and Oliviero, S. (2015). TET1 is controlled by pluripotency-associated factors in ESCs and downmodulated by PRC2 in differentiated cells and tissues. *Nucleic Acids Res* 43, 6814-6826.

Trapnell, C., Pachter, L., and Salzberg, S. L. (2009). TopHat: discovering splice junctions with RNA-Seq. *Bioinformatics* 25, 1105-1111.
